# Supplementary material for: Design, synthesis, and biological evaluation of novel asiatic acid derivatives as potential anticancer agents
Source: Royal Society of Chemistry journal article supplement (doi:10.1039/c6ra04597a), 2016-01-01

## Supplementary Information

### ***Design, synthesis, and biological evaluation of novel asiatic acid derivatives as potential anticancer agents***

Bruno M.F. Gonçalves,<sup>a,b</sup> Jorge A. R. Salvador,<sup>a,b\*</sup> Diana S. M. Santos,<sup>a</sup> Silvia Marín,<sup>c,d</sup> and Marta Cascante<sup>c,d\*</sup>

<sup>a</sup> *Laboratory of Pharmaceutical Chemistry, Faculty of Pharmacy, University of Coimbra, Portugal. Fax: +351 239 488 503; Tel: +351 239 488 400; E-mail: salvador@ci.uc.pt.*

<sup>b</sup> *Center for Neuroscience and Cell Biology, Coimbra, Portugal.*

<sup>c</sup> *Department of Biochemistry and Molecular Biology, Faculty of Biology, University of Barcelona, Diagonal 643, 08028 Barcelona, Spain; Tel +34-934021593; Email: martacascante@ub.edu*

<sup>d</sup> *Institute of Biomedicine of University of Barcelona (IBUB) and Associated Unit to CSIC, Barcelona, Spain.*

# Table of Contents

|                                                                                      |    |
|--------------------------------------------------------------------------------------|----|
| 1. NMR data for compound 7.....                                                      | 4  |
| 1.1 <sup>1</sup> H-NMR spectrum for compound 7 recorded in CDCl <sub>3</sub> .....   | 4  |
| 1.2 <sup>13</sup> C-NMR spectrum for compound 7 recorded in CDCl <sub>3</sub> .....  | 5  |
| 1.3 DEPT135 spectrum for compound 7 recorded in CDCl <sub>3</sub> .....              | 6  |
| 2. NMR data for compound 8.....                                                      | 7  |
| 2.1 <sup>1</sup> H-NMR spectrum for compound 8 recorded in CDCl <sub>3</sub> .....   | 7  |
| 2.2 <sup>13</sup> C-NMR spectrum for compound 8 recorded in CDCl <sub>3</sub> .....  | 8  |
| 2.3 DEPT135 spectrum for compound 8 recorded in CDCl <sub>3</sub> .....              | 9  |
| 3. NMR data for compound 9.....                                                      | 10 |
| 3.1 <sup>1</sup> H-NMR spectrum for compound 9 recorded in CDCl <sub>3</sub> .....   | 10 |
| 3.2 <sup>13</sup> C-NMR spectrum for compound 9 recorded in CDCl <sub>3</sub> .....  | 11 |
| 3.3 DEPT135 spectrum for compound 9 recorded in CDCl <sub>3</sub> .....              | 12 |
| 4. NMR data for compound 10.....                                                     | 13 |
| 4.1 <sup>1</sup> H-NMR spectrum for compound 10 recorded in CDCl <sub>3</sub> .....  | 13 |
| 4.2 <sup>13</sup> C-NMR spectrum for compound 10 recorded in CDCl <sub>3</sub> ..... | 14 |
| 4.3 DEPT135 spectrum for compound 10 recorded in CDCl <sub>3</sub> .....             | 15 |
| 5 NMR data for compound 11:.....                                                     | 16 |
| 5.1 <sup>1</sup> H-NMR spectrum for compound 11 recorded in CDCl <sub>3</sub> .....  | 16 |
| 5.2 <sup>13</sup> C-NMR spectrum for compound 11 recorded in CDCl <sub>3</sub> ..... | 17 |
| 5.3 DEPT135 spectrum for compound 11 recorded in CDCl <sub>3</sub> .....             | 18 |
| 6. NMR data for compound 12.....                                                     | 19 |
| 6.1 <sup>1</sup> H-NMR spectrum for compound 12 recorded in CDCl <sub>3</sub> .....  | 19 |
| 6.2 <sup>13</sup> C-NMR spectrum for compound 12 recorded in CDCl <sub>3</sub> ..... | 20 |
| 6.3 DEPT135 spectrum for compound 12 recorded in CDCl <sub>3</sub> .....             | 21 |
| 7. NMR data for compound 13.....                                                     | 22 |
| 7.1 <sup>1</sup> H-NMR spectrum for compound 13 recorded in CDCl <sub>3</sub> .....  | 22 |
| 7.2 <sup>13</sup> C-NMR spectrum for compound 13 recorded in CDCl <sub>3</sub> ..... | 23 |
| 7.3 DEPT135 spectrum for compound 13 recorded in CDCl <sub>3</sub> .....             | 24 |
| 8. NMR data for compound 14.....                                                     | 25 |
| 8.1 <sup>1</sup> H-NMR spectrum for compound 14 recorded in CDCl <sub>3</sub> .....  | 25 |

|                                                                                      |    |
|--------------------------------------------------------------------------------------|----|
| 8.2 $^{13}\text{C}$ -NMR spectrum for compound 14 recorded in $\text{CDCl}_3$ .....  | 26 |
| 8.3 DEPT135 spectrum for compound 14 recorded in $\text{CDCl}_3$ .....               | 27 |
| 9. NMR data for compound 15.....                                                     | 28 |
| 9.1 $^1\text{H}$ -NMR spectrum for compound 15 recorded in $\text{CDCl}_3$ .....     | 28 |
| 9.2 $^{13}\text{C}$ -NMR spectrum for compound 15 recorded in $\text{CDCl}_3$ .....  | 29 |
| 9.3 DEPT135 spectrum for compound 15 recorded in $\text{CDCl}_3$ .....               | 30 |
| 10. NMR data for compound 16.....                                                    | 31 |
| 10.1 $^1\text{H}$ -NMR spectrum for compound 16 recorded in $\text{CDCl}_3$ .....    | 31 |
| 10.2 $^{13}\text{C}$ -NMR spectrum for compound 16 recorded in $\text{CDCl}_3$ ..... | 32 |
| 10.3 DEPT135 spectrum for compound 16 recorded in $\text{CDCl}_3$ .....              | 33 |
| 11. NMR data for compound 17.....                                                    | 34 |
| 11.1 $^1\text{H}$ -NMR spectrum for compound 17 recorded in $\text{CDCl}_3$ .....    | 34 |
| 11.2 $^{13}\text{C}$ -NMR spectrum for compound 17 recorded in $\text{CDCl}_3$ ..... | 35 |
| 11.3 DEPT135 spectrum for compound 17 recorded in $\text{CDCl}_3$ .....              | 36 |

# 1. NMR data for compound 7

1.1 <sup>1</sup>H-NMR spectrum for compound 7 recorded in CDCl<sub>3</sub>

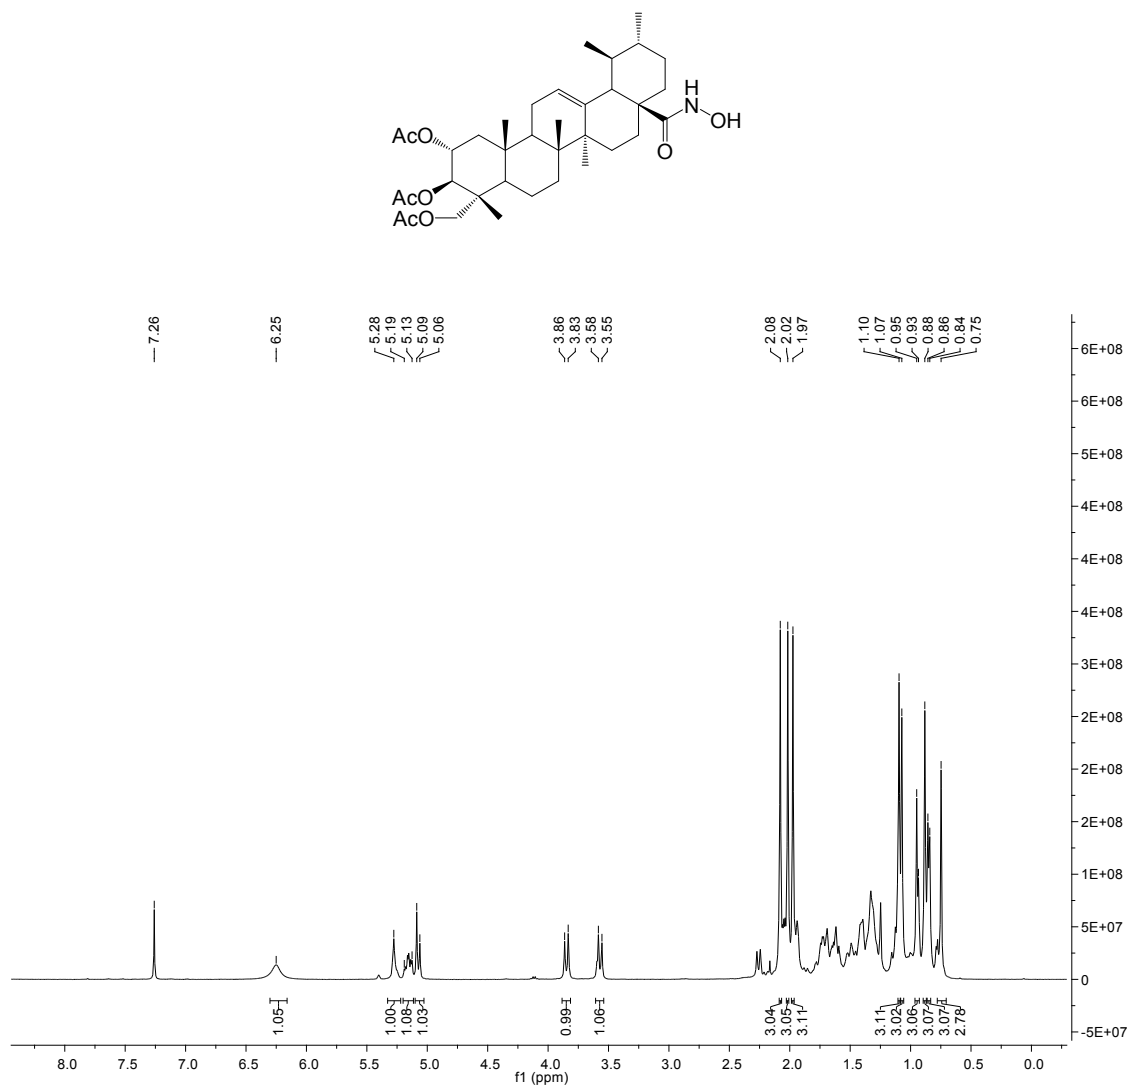

1.2  $^{13}\text{C}$ -NMR spectrum for compound 7 recorded in  $\text{CDCl}_3$

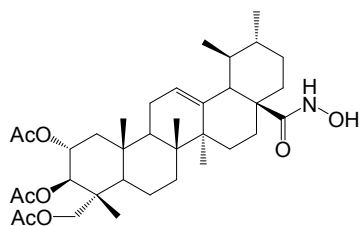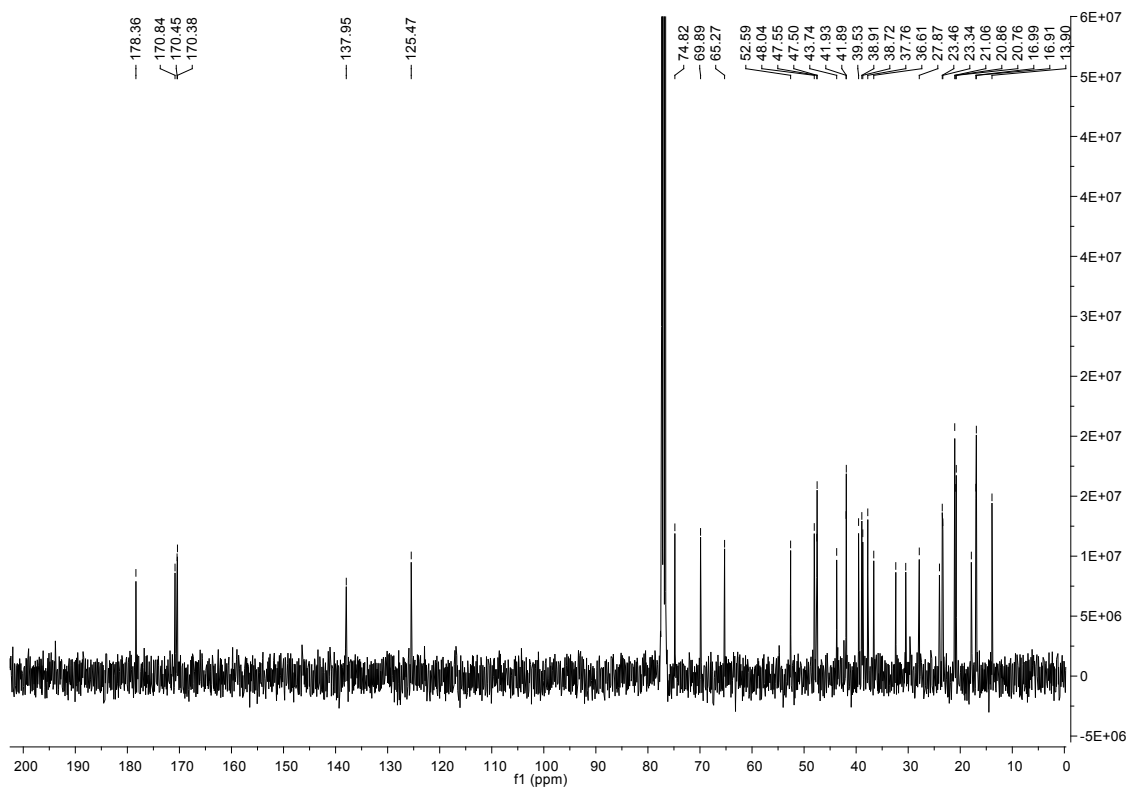

1.3 DEPT135 spectrum for compound 7 recorded in CDCl<sub>3</sub>

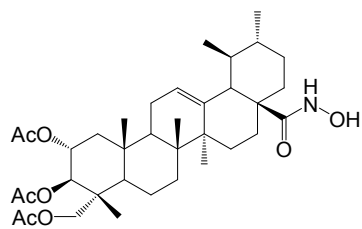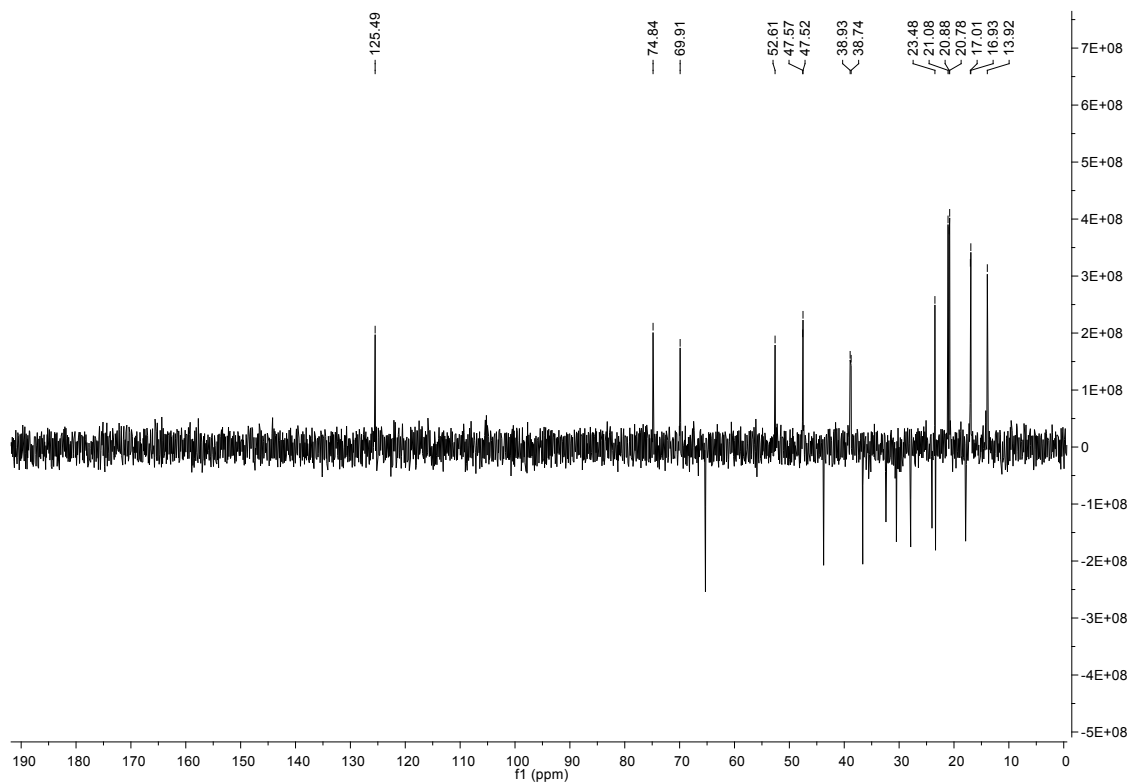

## 2. NMR data for compound 8

### 2.1 <sup>1</sup>H-NMR spectrum for compound 8 recorded in CDCl<sub>3</sub>

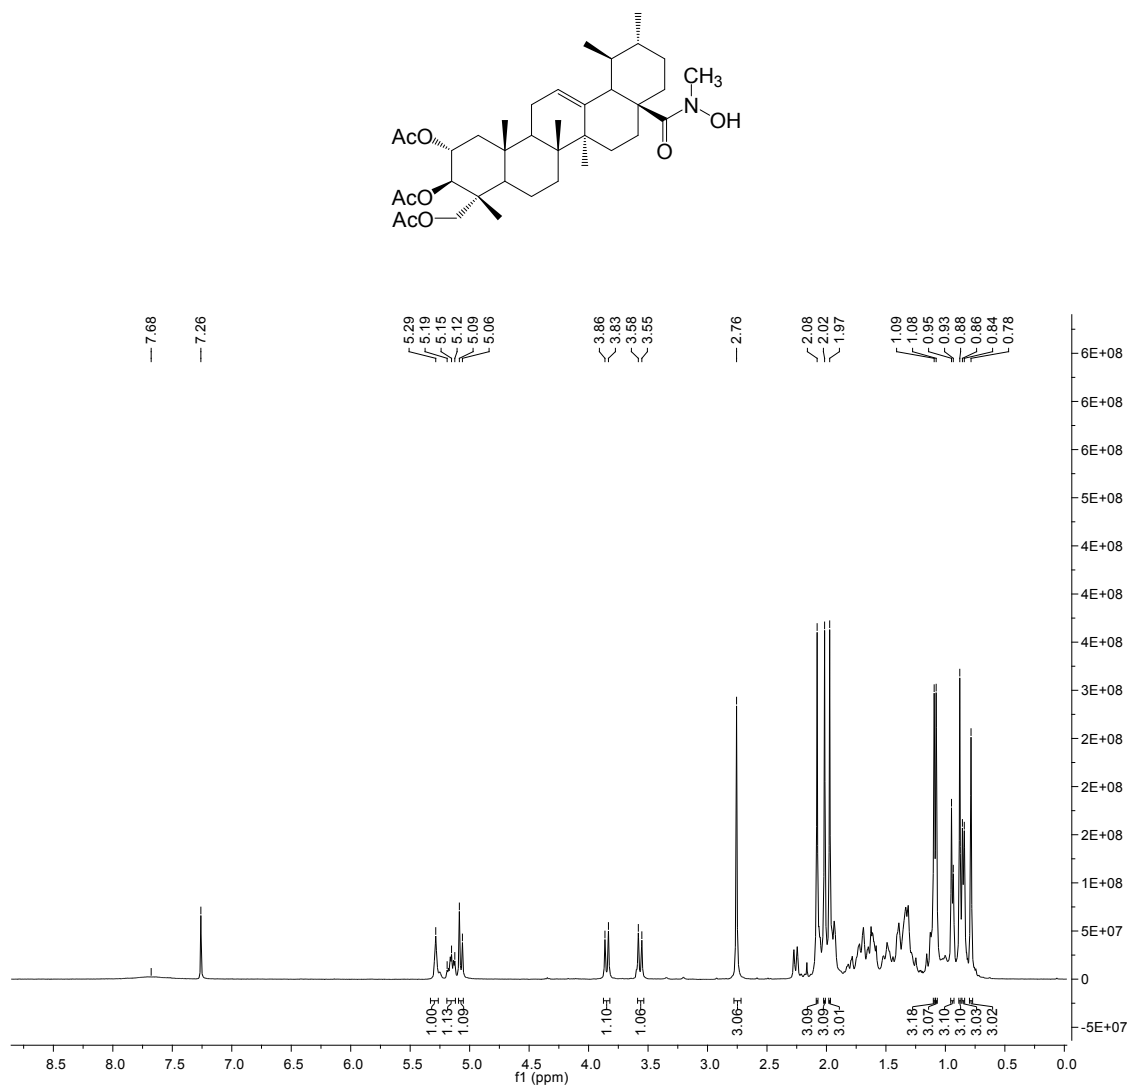

2.2  $^{13}\text{C}$ -NMR spectrum for compound 8 recorded in  $\text{CDCl}_3$

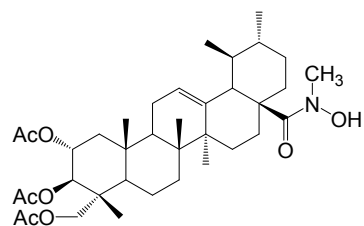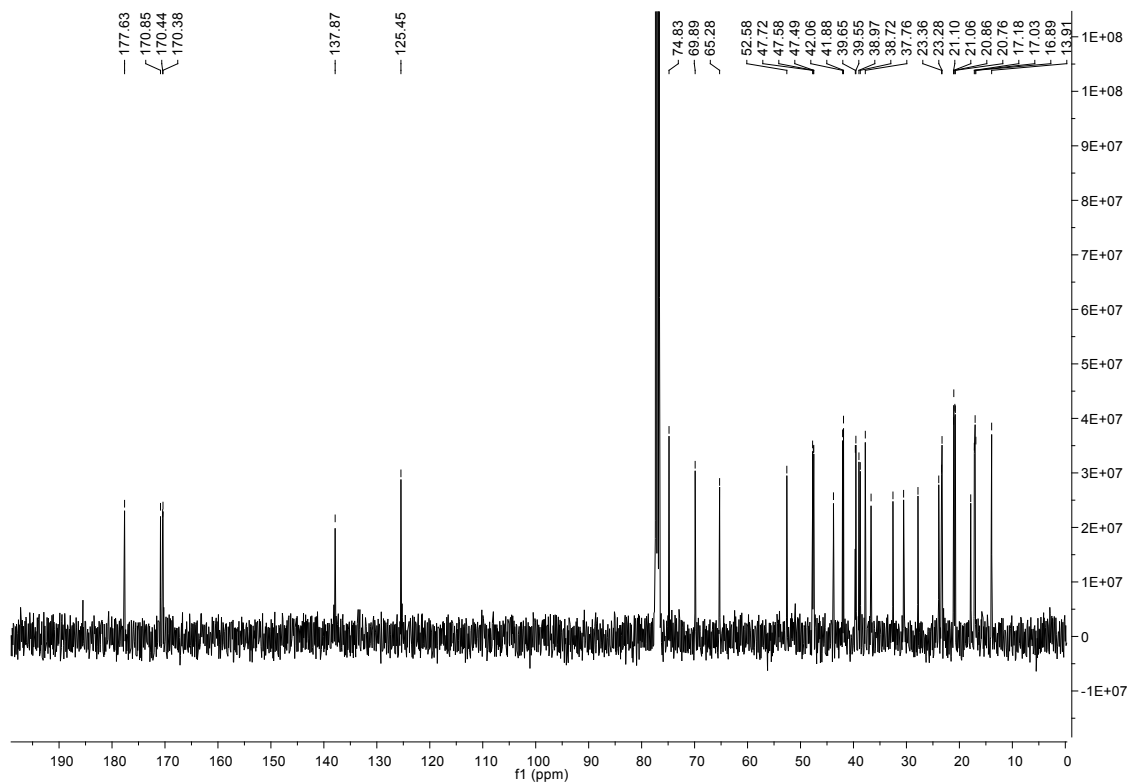





### 3. NMR data for compound 9

#### 3.1 <sup>1</sup>H-NMR spectrum for compound 9 recorded in CDCl<sub>3</sub>

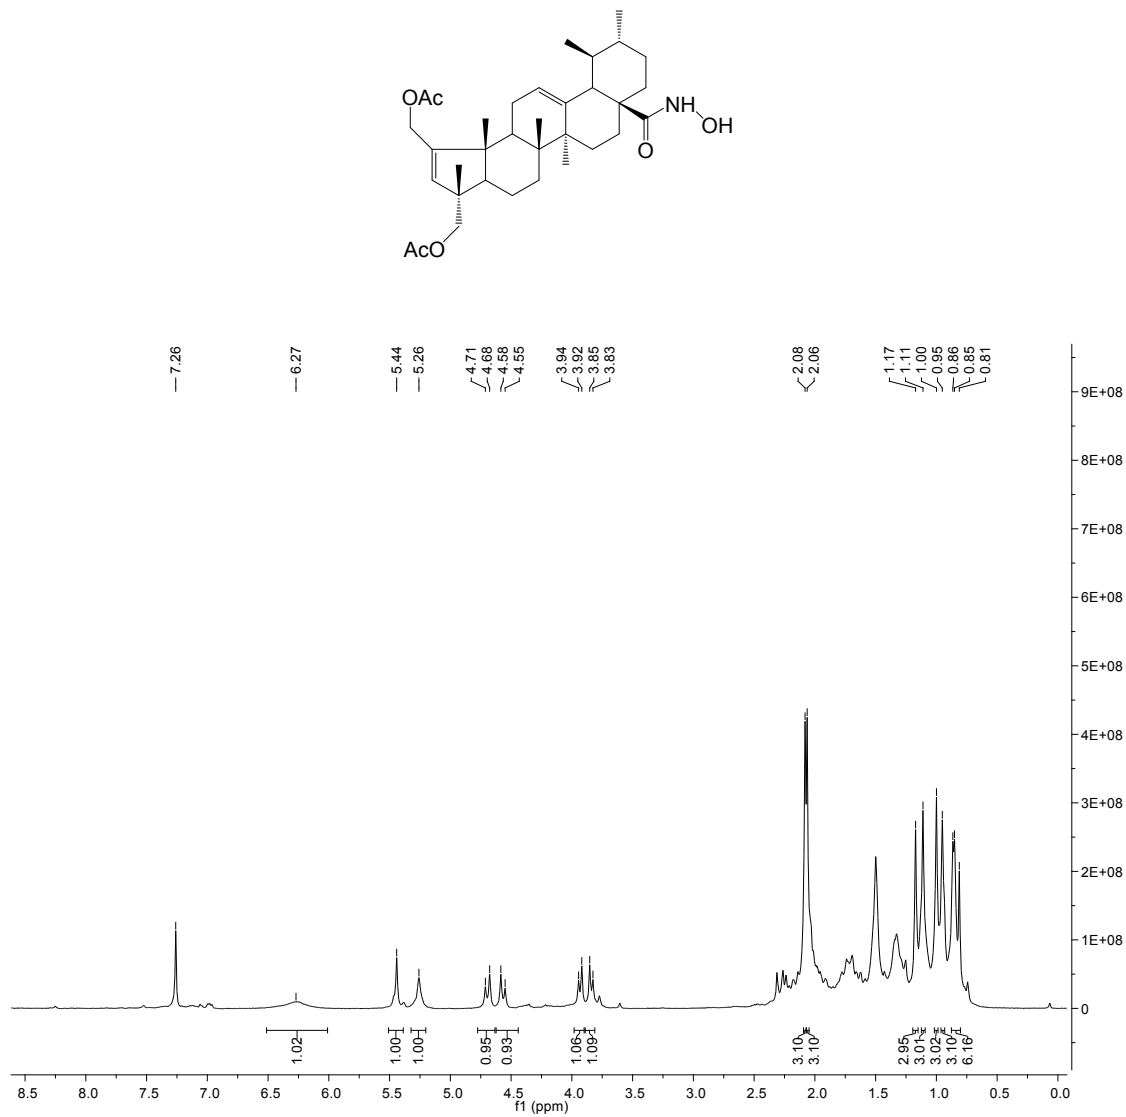

3.2  $^{13}\text{C}$ -NMR spectrum for compound 9 recorded in  $\text{CDCl}_3$

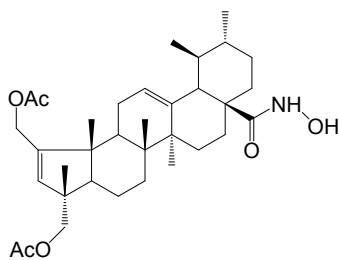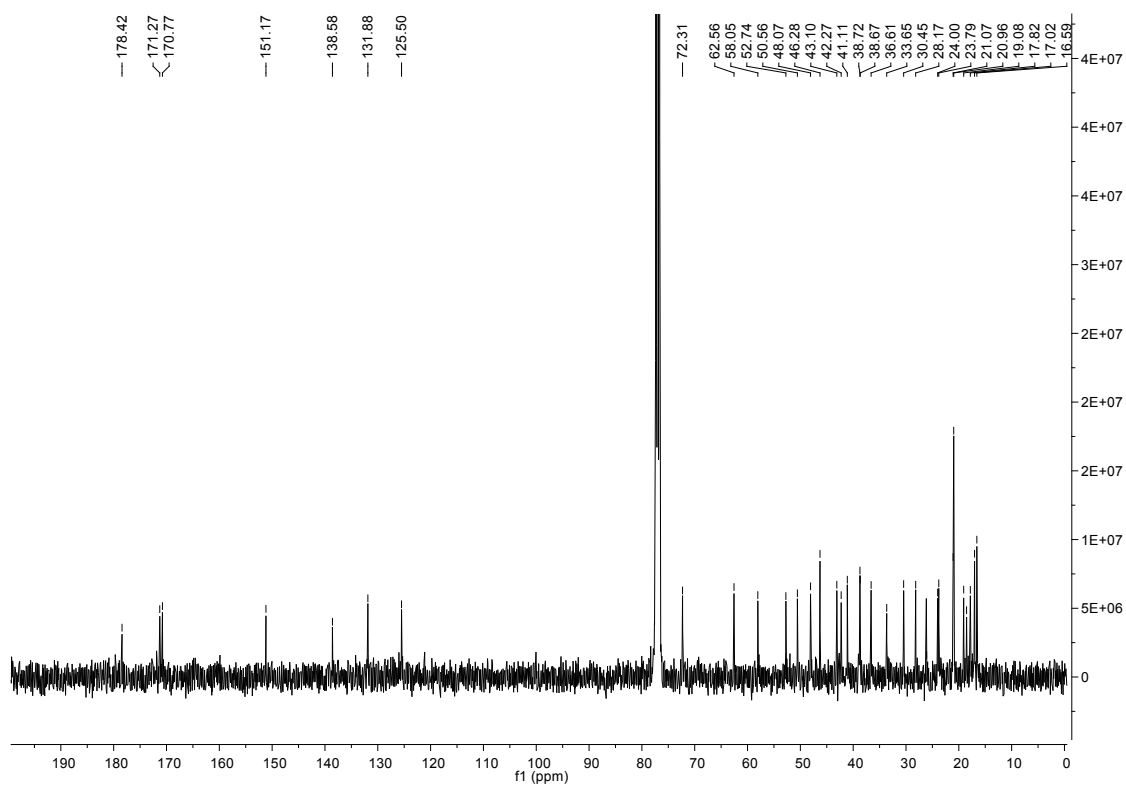

3.3 DEPT135 spectrum for compound 9 recorded in CDCl<sub>3</sub>

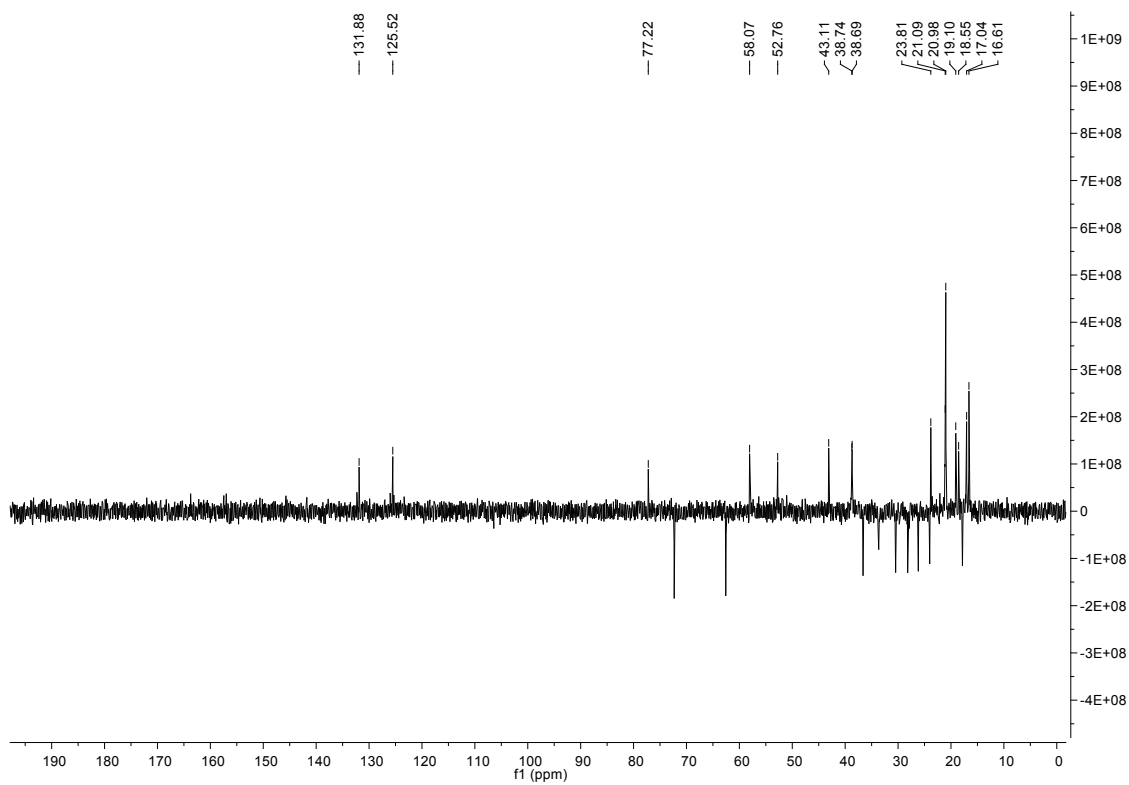

## 4. NMR data for compound 10

### 4.1 <sup>1</sup>H-NMR spectrum for compound 10 recorded in CDCl<sub>3</sub>

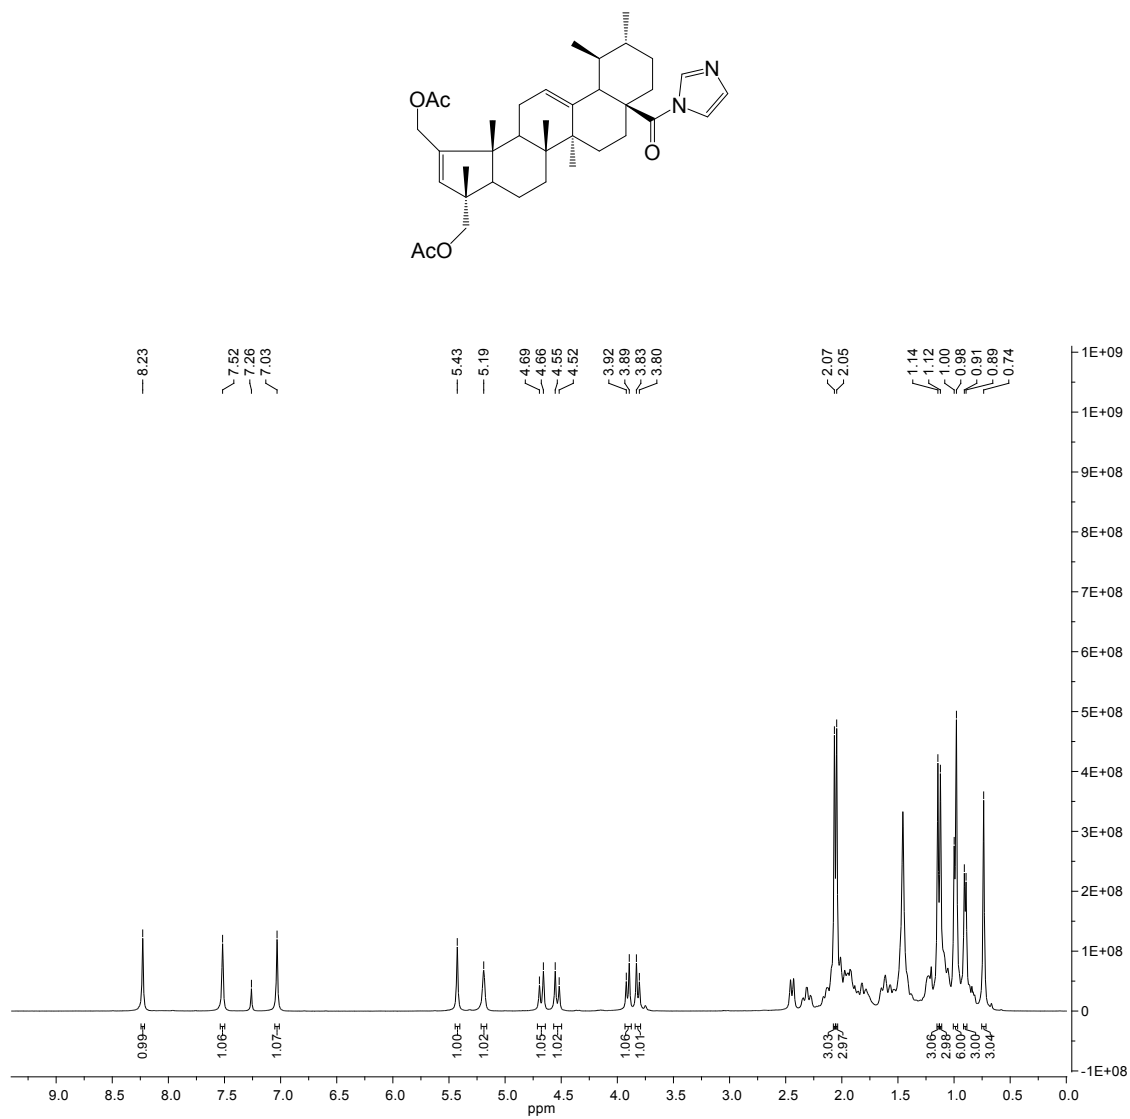

4.2  $^{13}\text{C}$ -NMR spectrum for compound 10 recorded in  $\text{CDCl}_3$

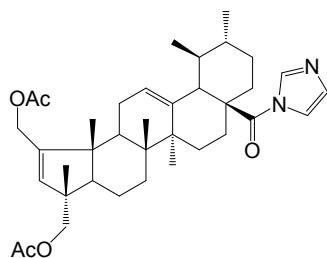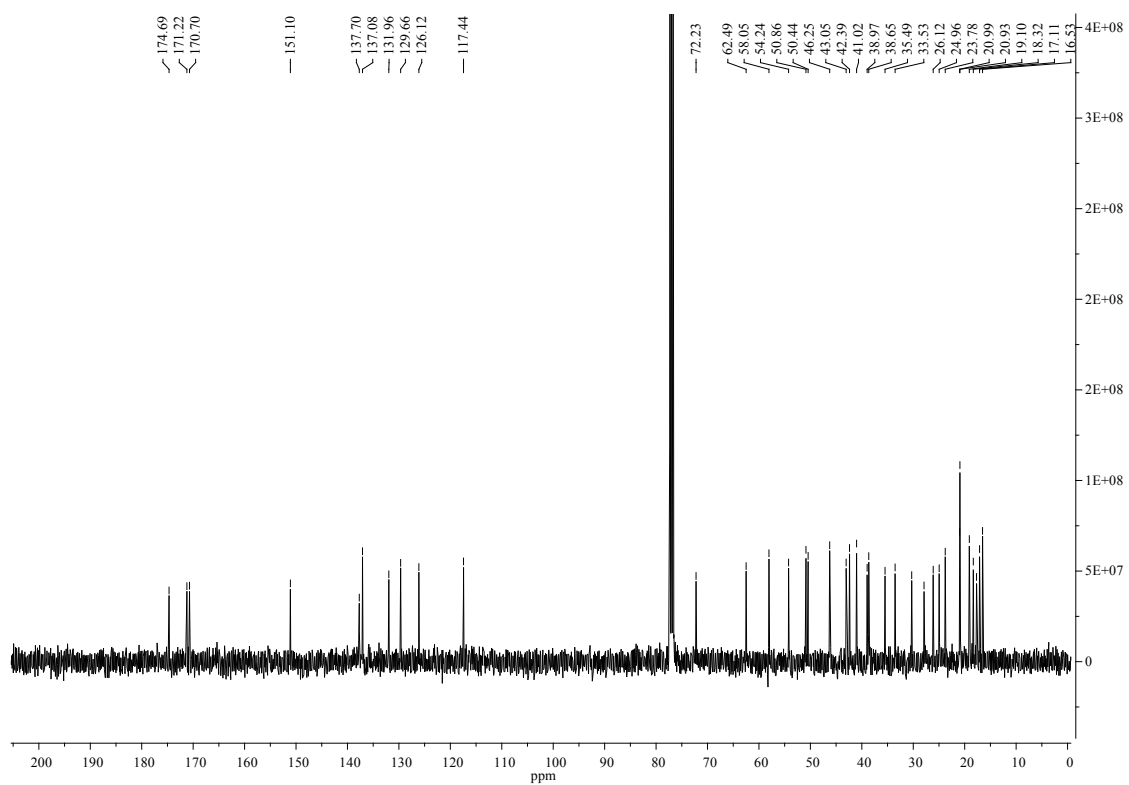

4.3 DEPT135 spectrum for compound 10 recorded in CDCl<sub>3</sub>

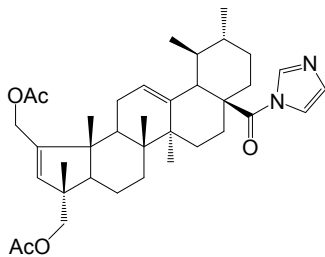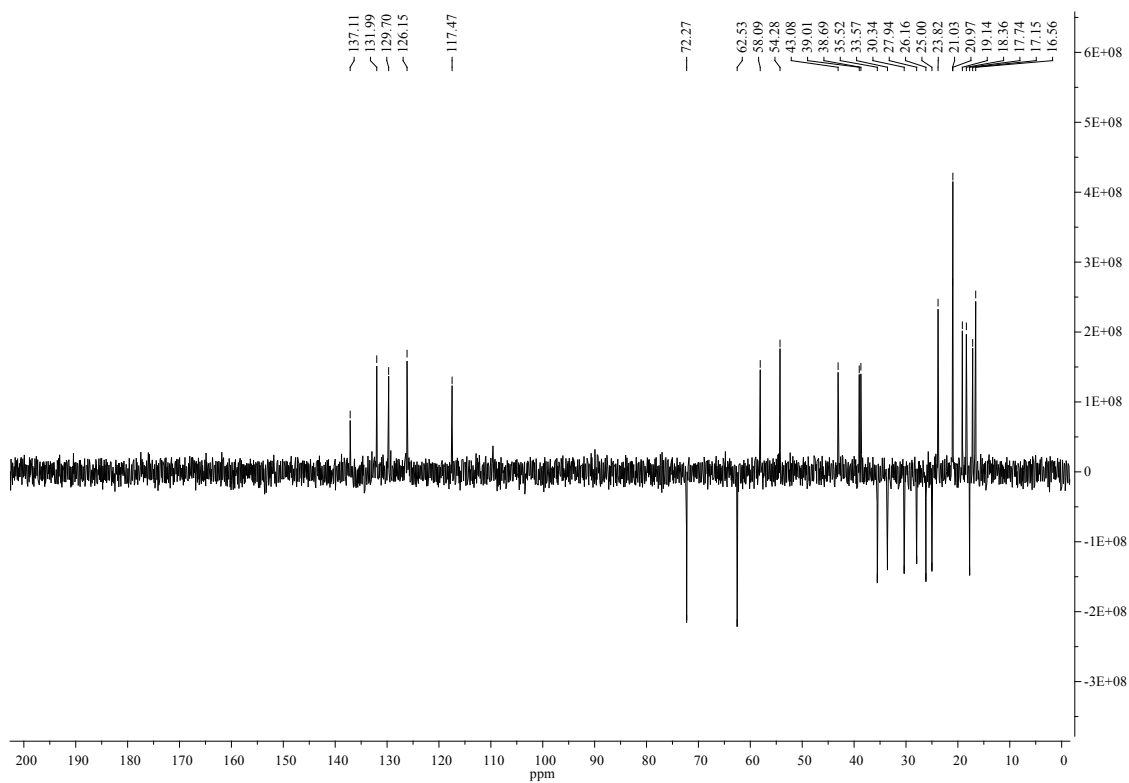

## 5 NMR data for compound 11:

5.1  $^1\text{H-NMR}$  spectrum for compound 11 recorded in  $\text{CDCl}_3$

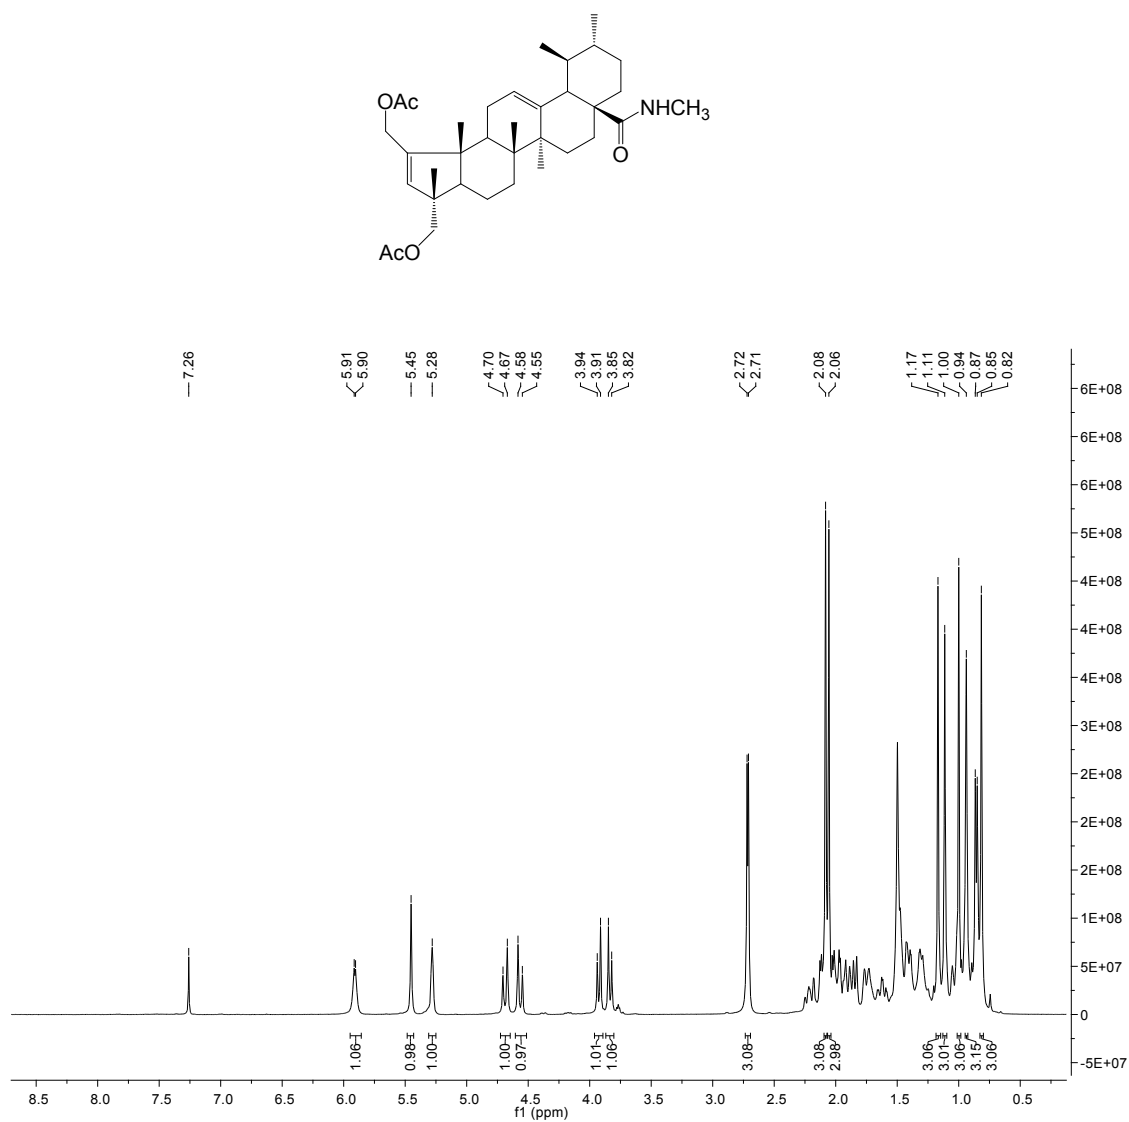



5.2  $^{13}\text{C}$ -NMR spectrum for compound 11 recorded in  $\text{CDCl}_3$

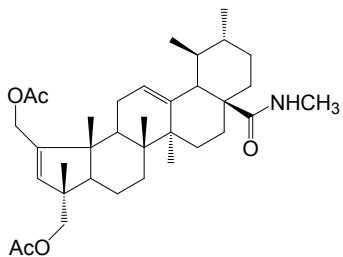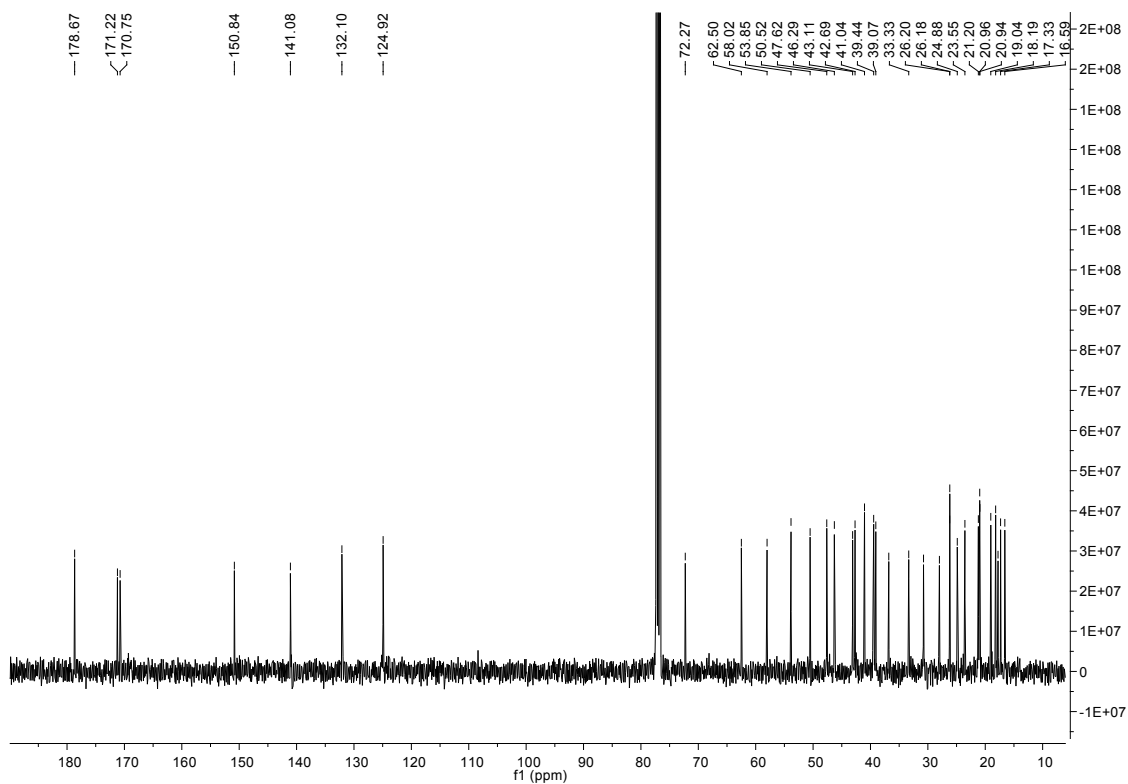

5.3 DEPT135 spectrum for compound 11 recorded in CDCl<sub>3</sub>

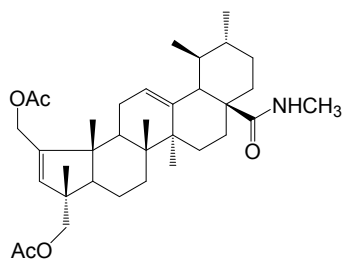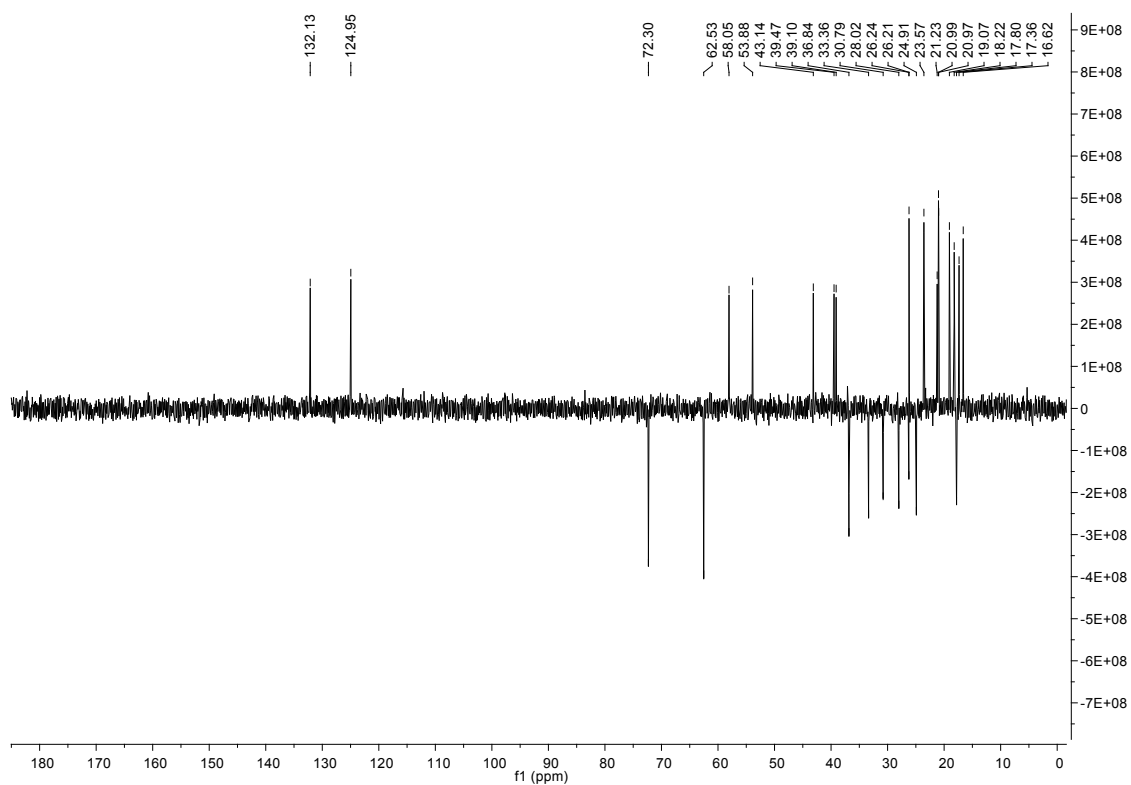

## 6. NMR data for compound 12

### 6.1 <sup>1</sup>H-NMR spectrum for compound 12 recorded in CDCl<sub>3</sub>

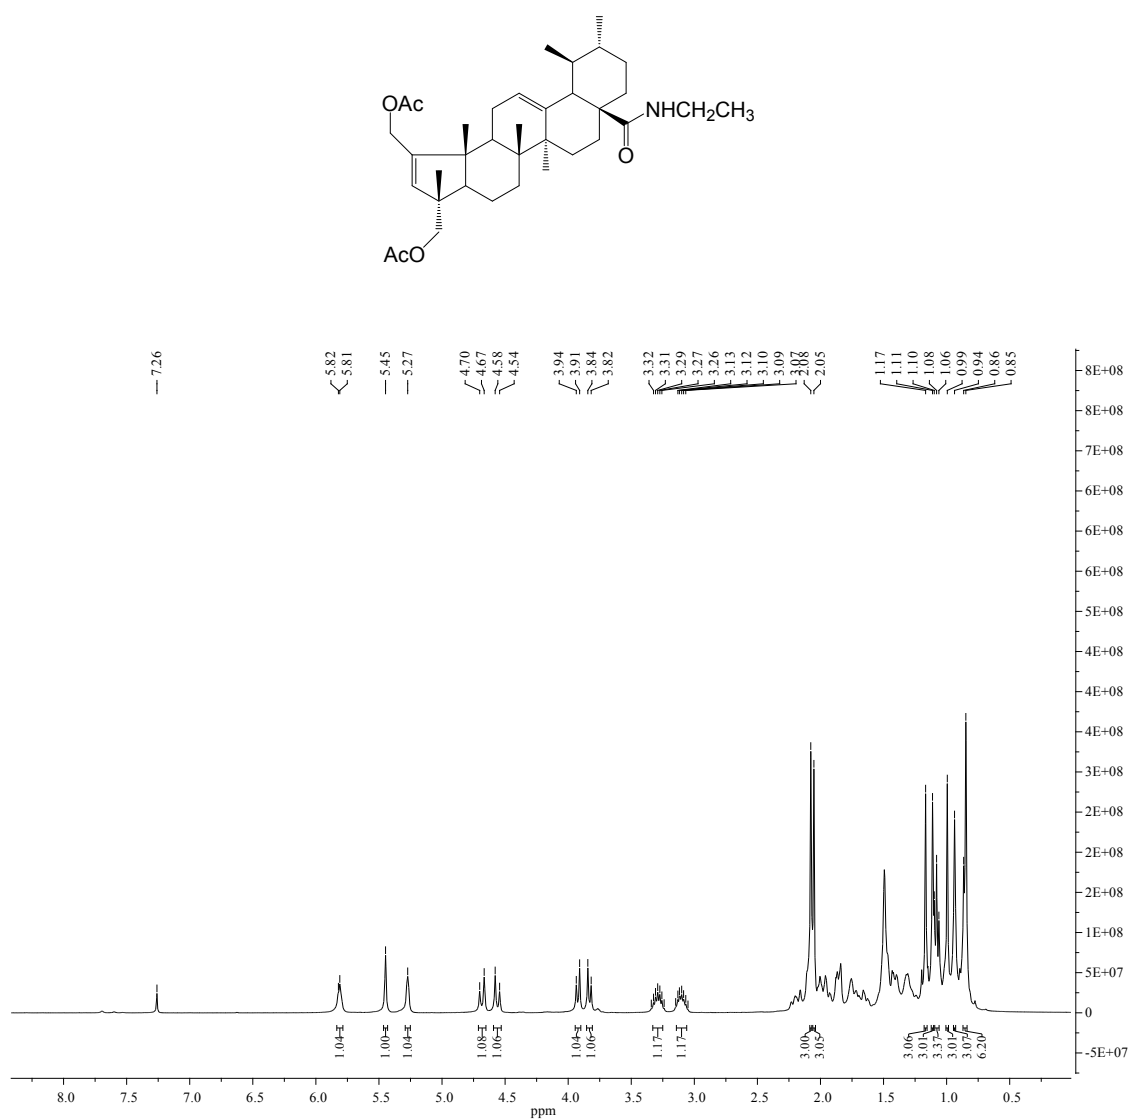

6.2  $^{13}\text{C}$ -NMR spectrum for compound 12 recorded in  $\text{CDCl}_3$

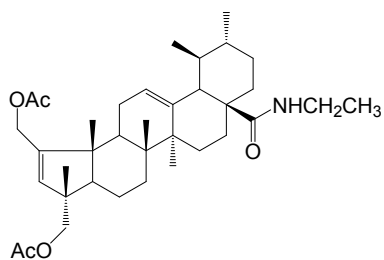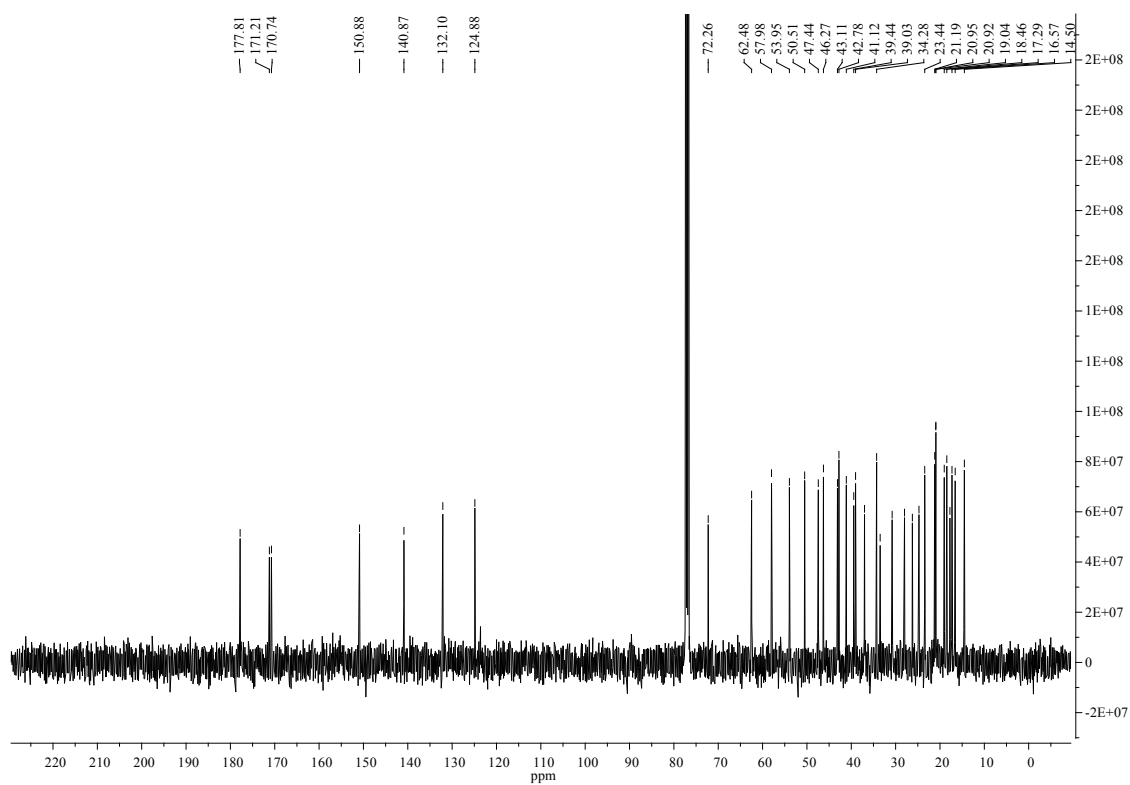

6.3 DEPT135 spectrum for compound 12 recorded in CDCl<sub>3</sub>

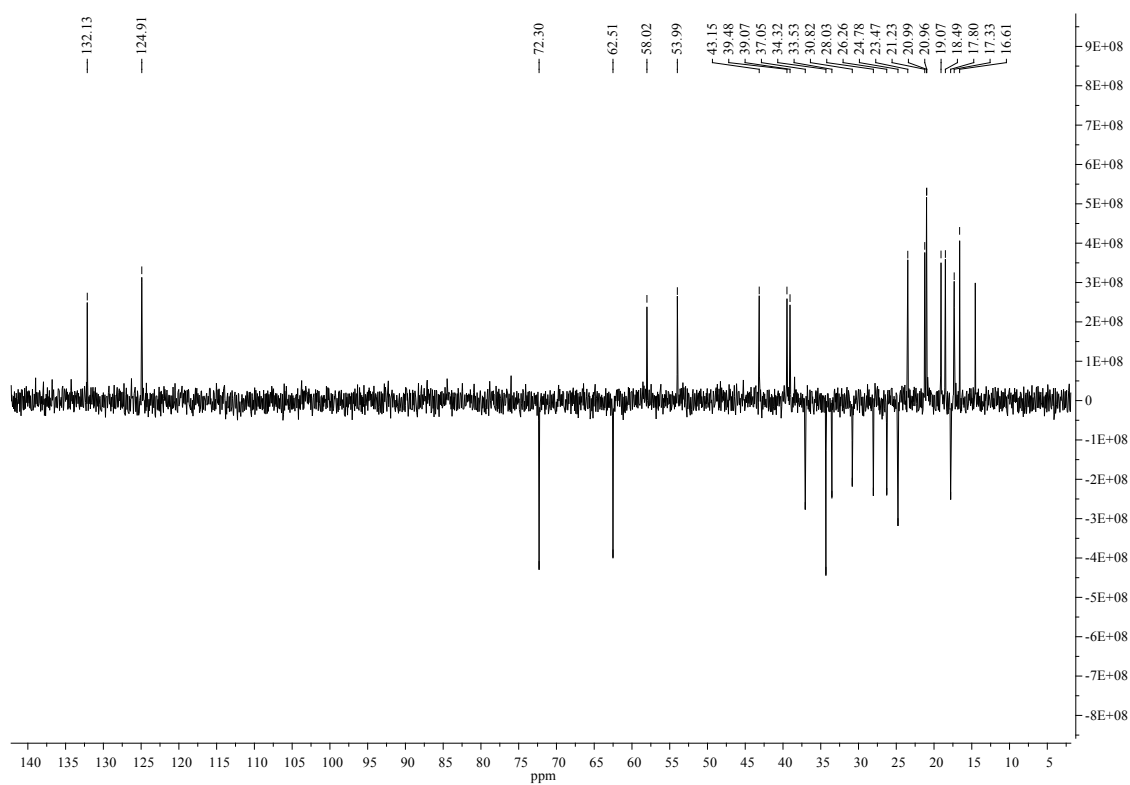

## 7. NMR data for compound 13

7.1 <sup>1</sup>H-NMR spectrum for compound 13 recorded in CDCl<sub>3</sub>

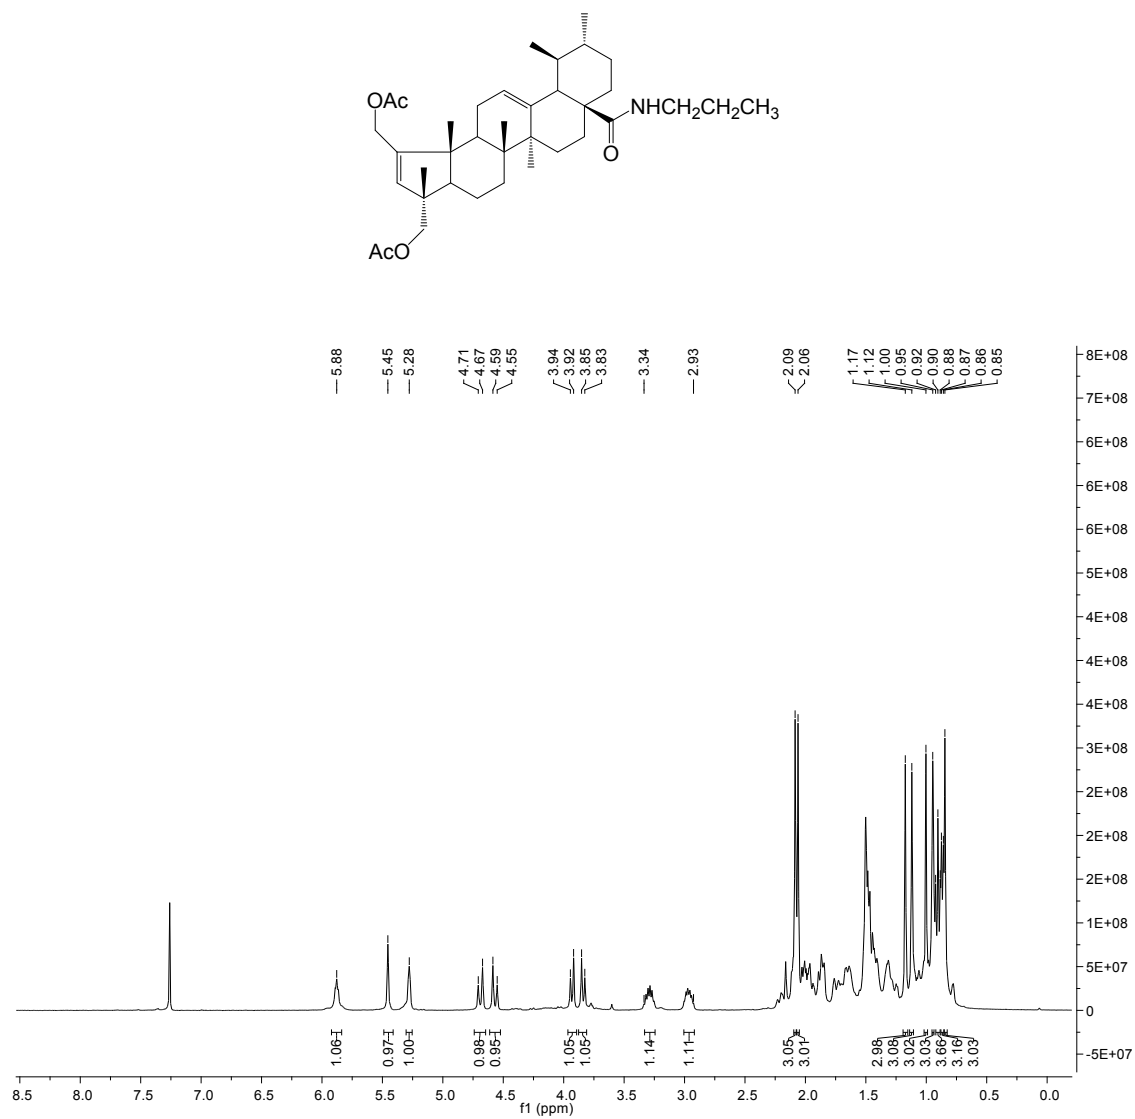

7.2  $^{13}\text{C}$ -NMR spectrum for compound 13 recorded in  $\text{CDCl}_3$

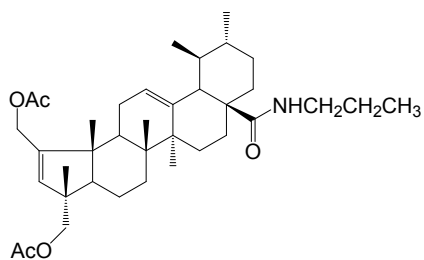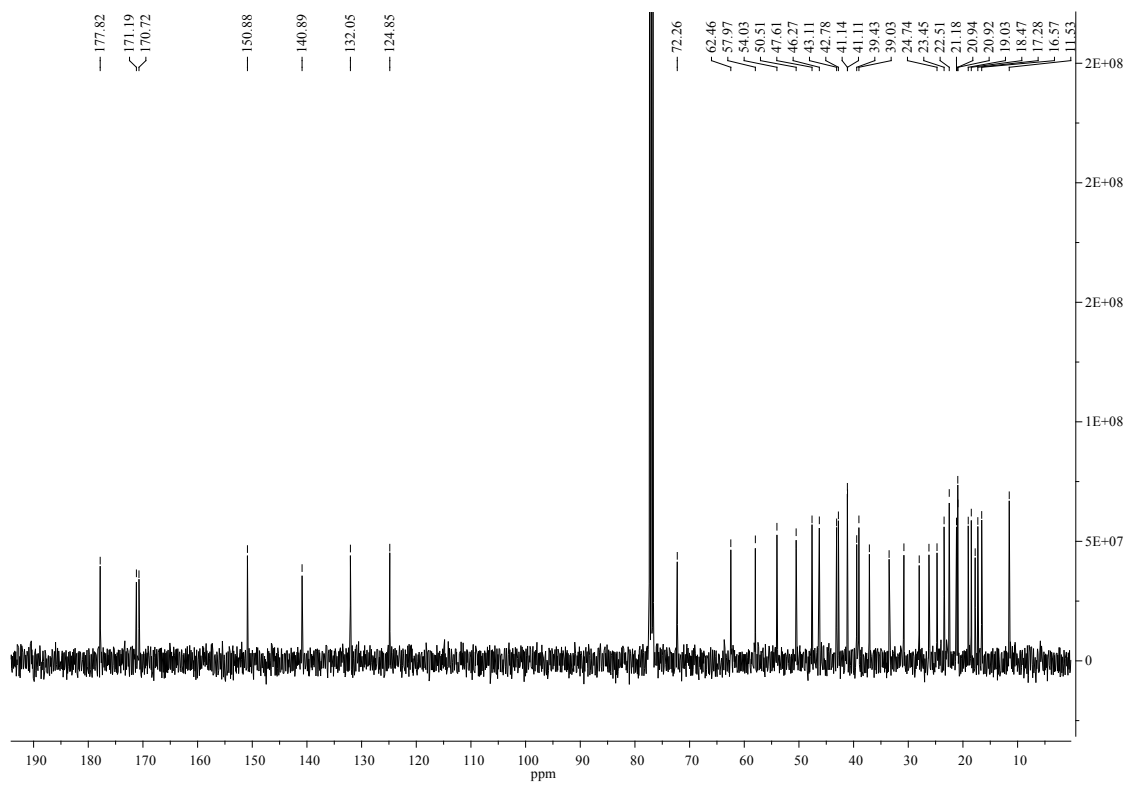

7.3 DEPT135 spectrum for compound 13 recorded in CDCl<sub>3</sub>

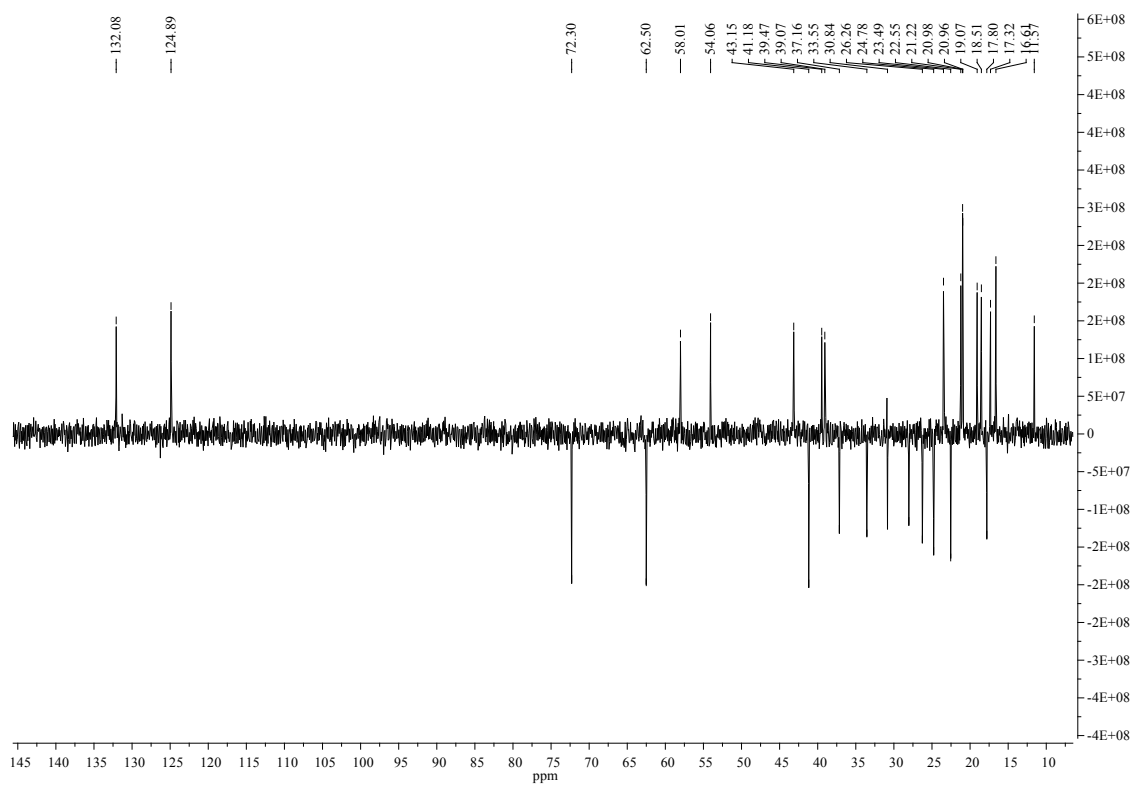



## 8. NMR data for compound 14

### 8.1 <sup>1</sup>H-NMR spectrum for compound 14 recorded in CDCl<sub>3</sub>

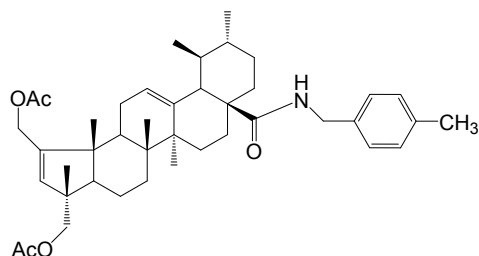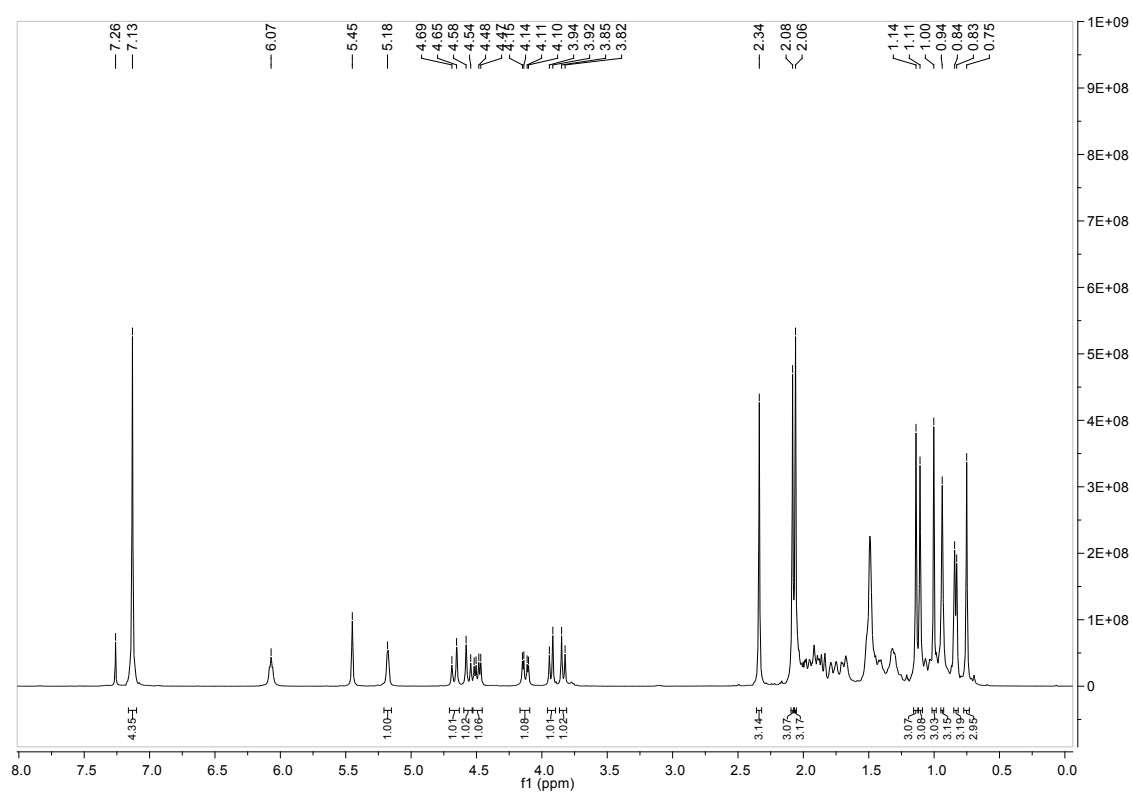

8.2  $^{13}\text{C}$ -NMR spectrum for compound 14 recorded in  $\text{CDCl}_3$

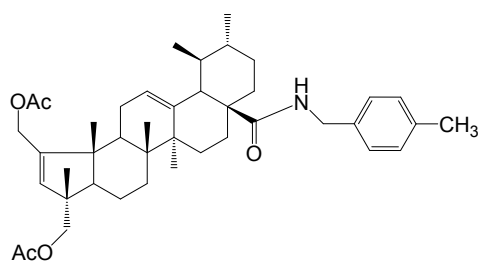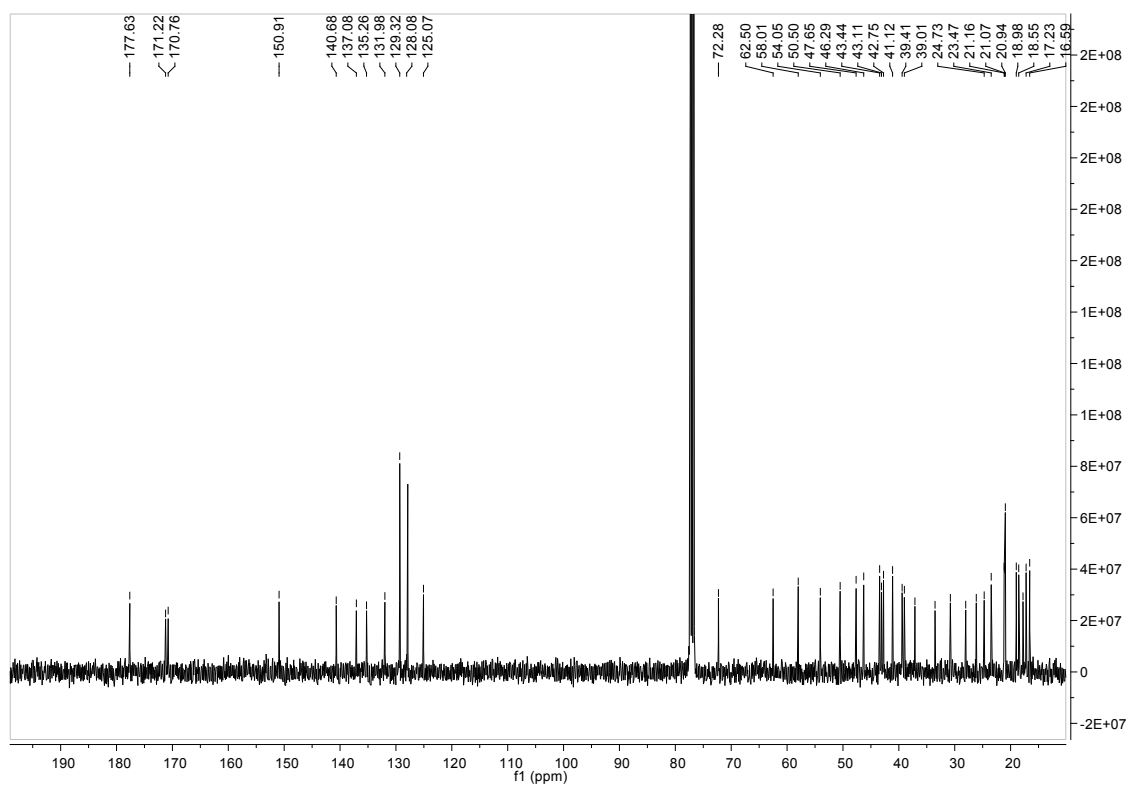

8.3 DEPT135 spectrum for compound 14 recorded in CDCl<sub>3</sub>

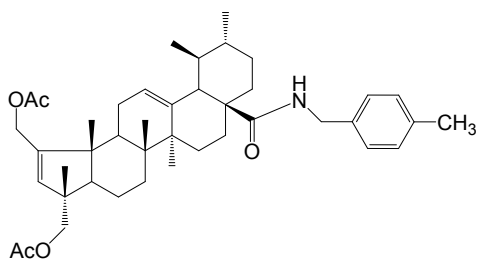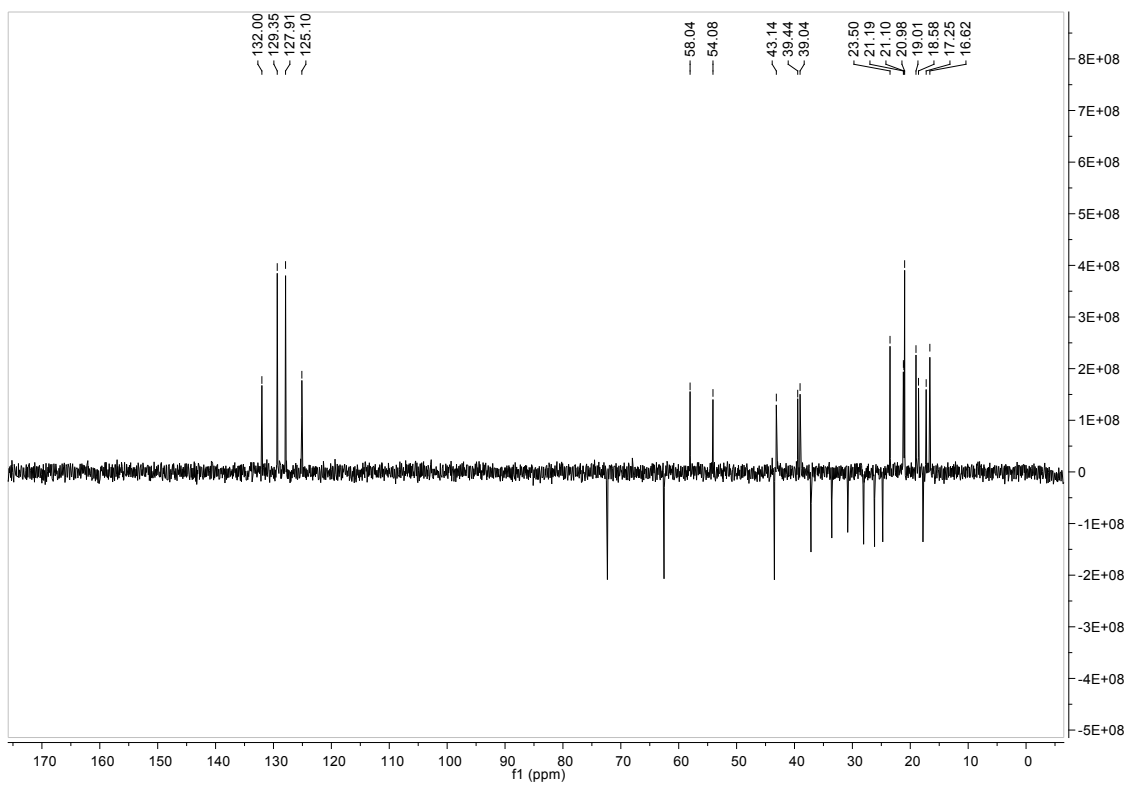

## 9. NMR data for compound 15

9.1  $^1\text{H-NMR}$  spectrum for compound 15 recorded in  $\text{CDCl}_3$

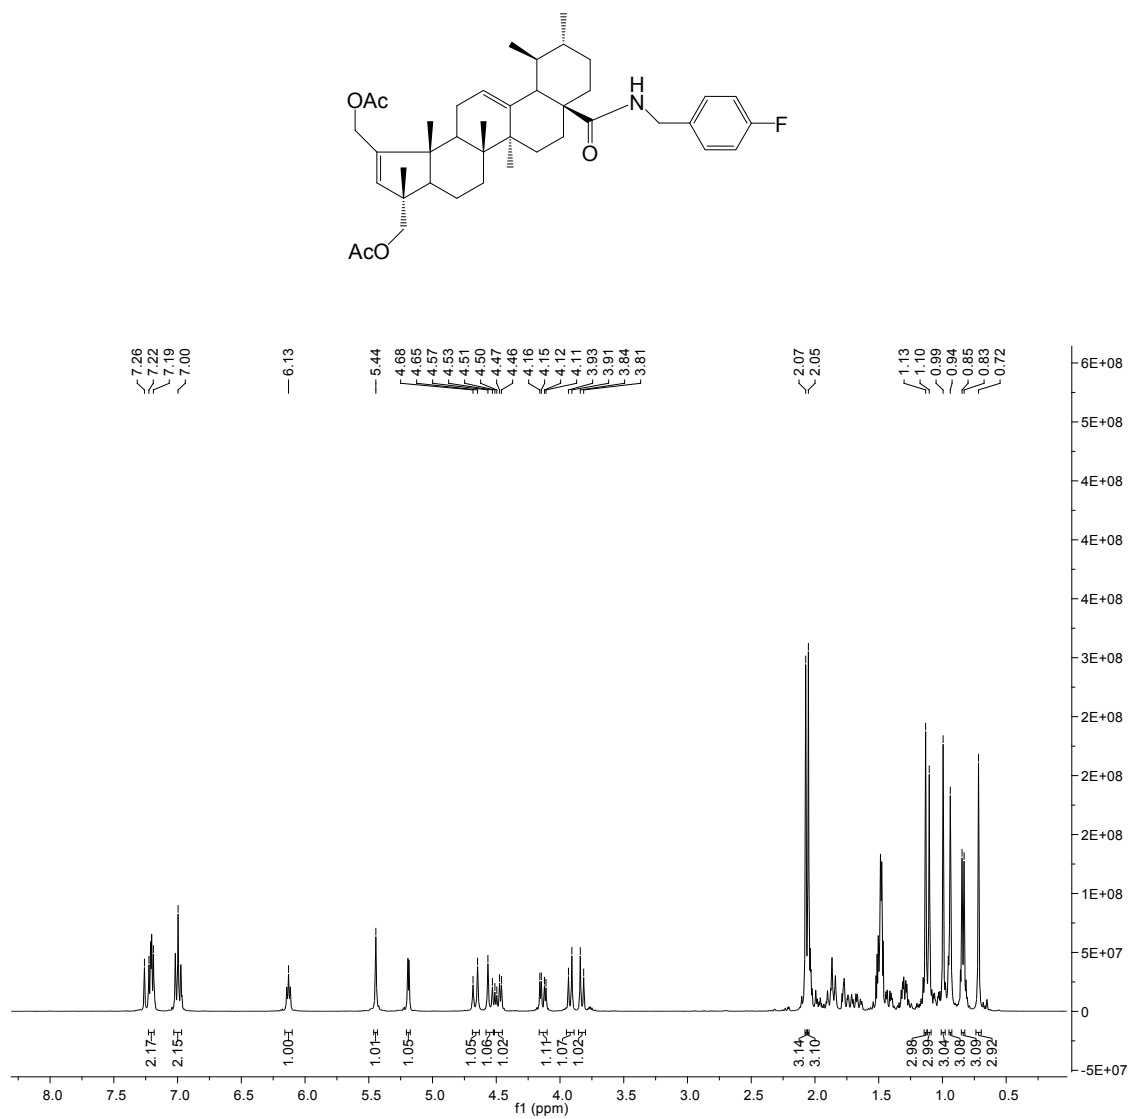

9.2  $^{13}\text{C}$ -NMR spectrum for compound 15 recorded in  $\text{CDCl}_3$

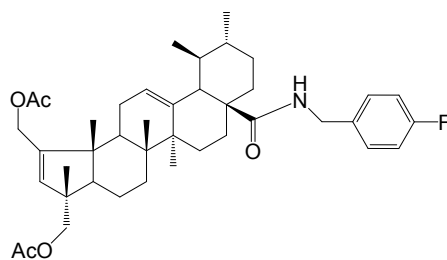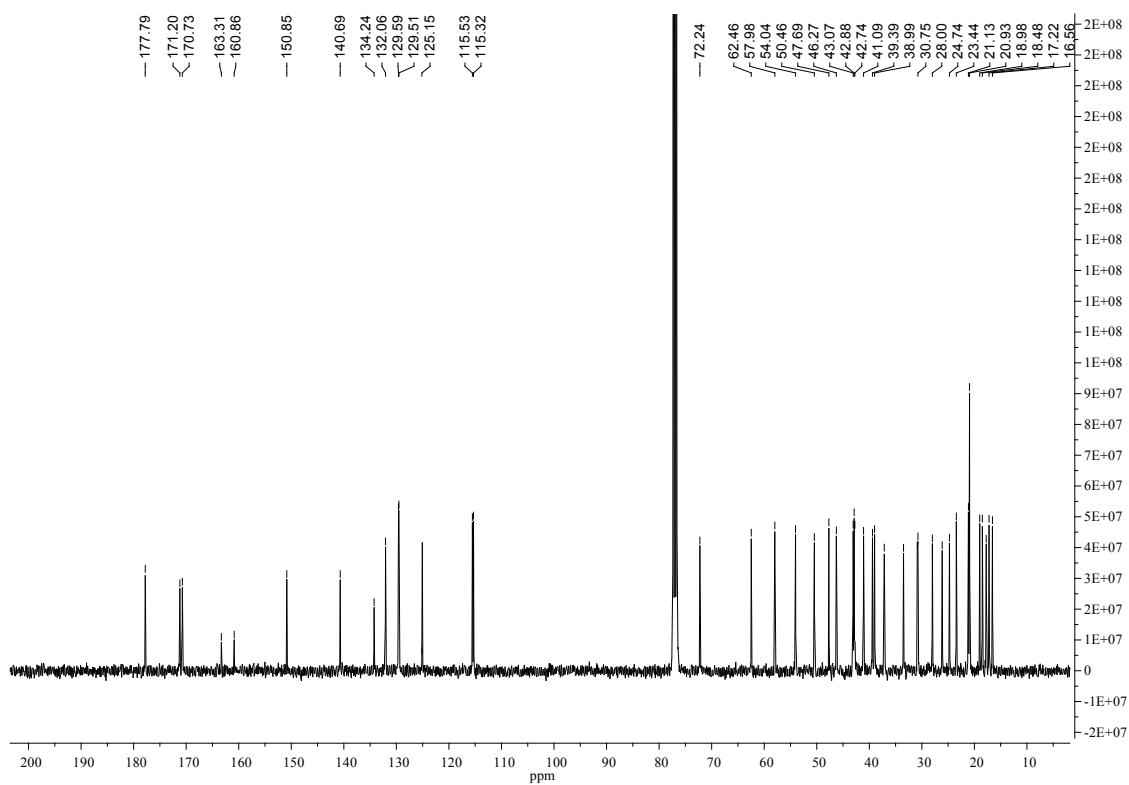

9.3 DEPT135 spectrum for compound 15 recorded in CDCl<sub>3</sub>

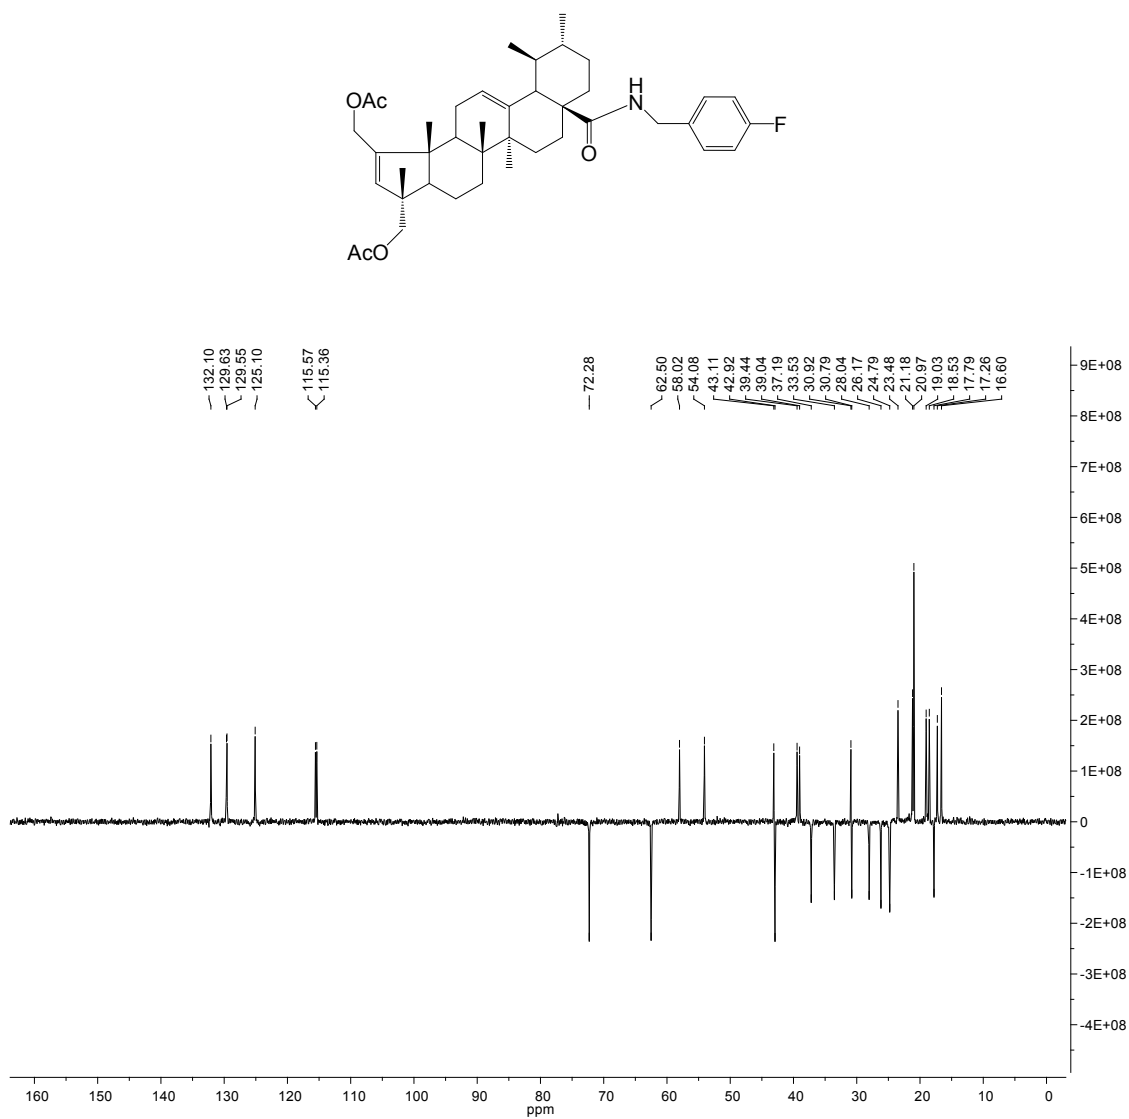

## 10. NMR data for compound 16

### 10.1 $^1\text{H}$ -NMR spectrum for compound 16 recorded in $\text{CDCl}_3$

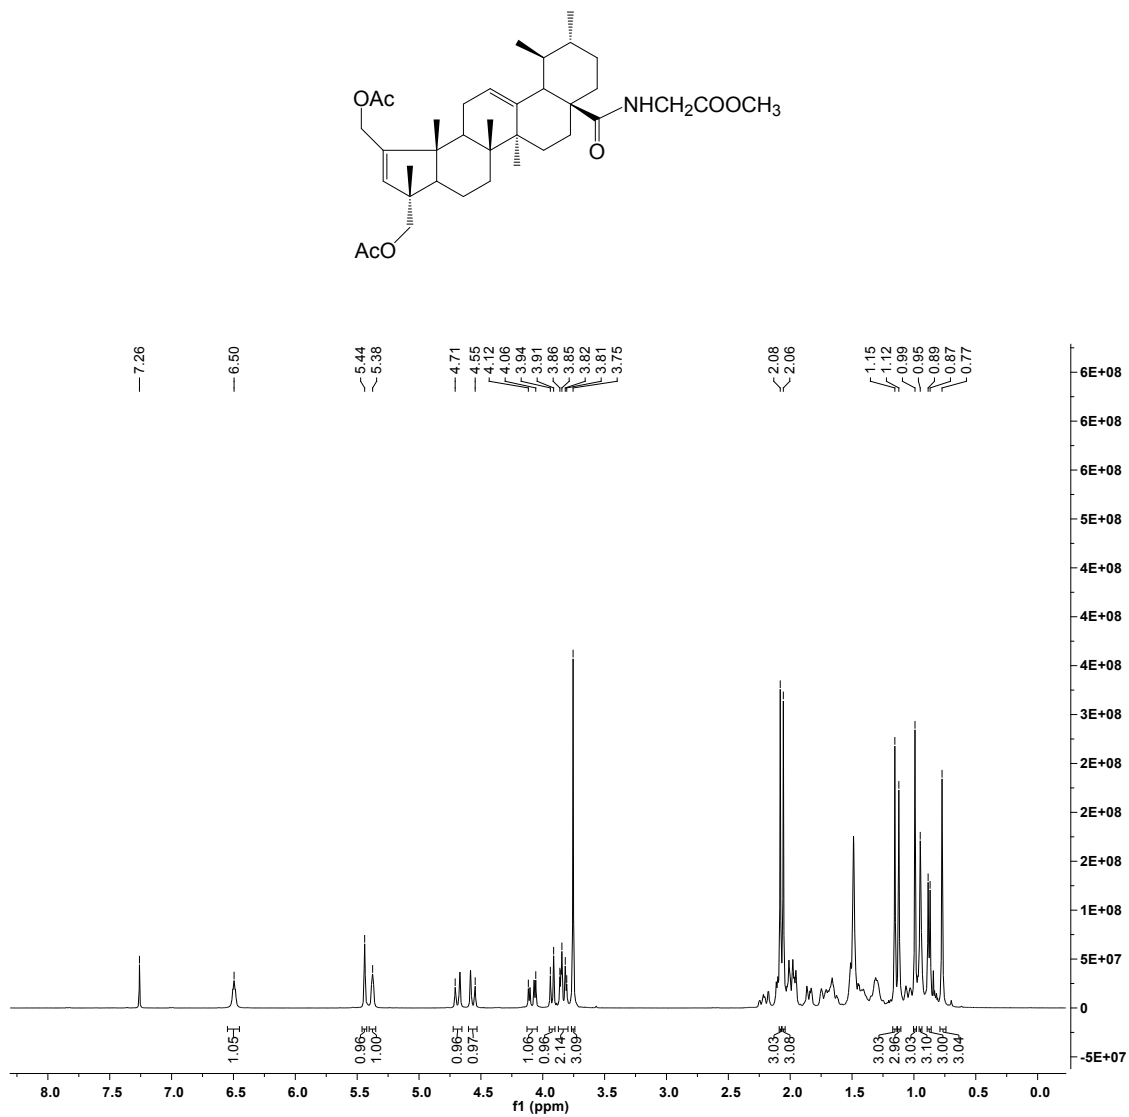

10.2  $^{13}\text{C}$ -NMR spectrum for compound 16 recorded in  $\text{CDCl}_3$

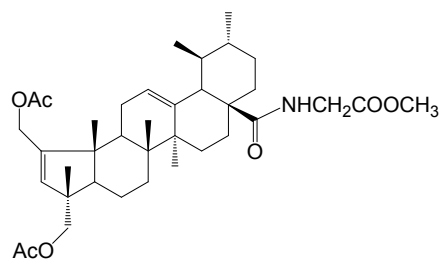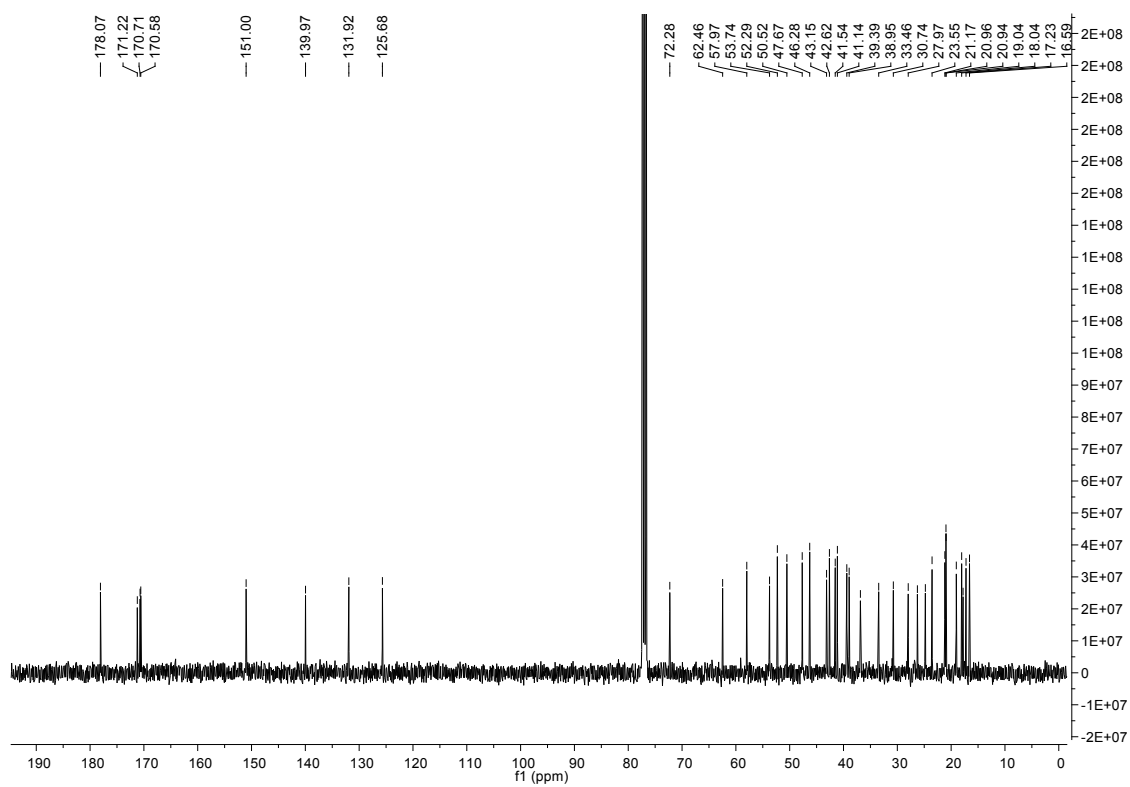



10.3 DEPT135 spectrum for compound 16 recorded in CDCl<sub>3</sub>

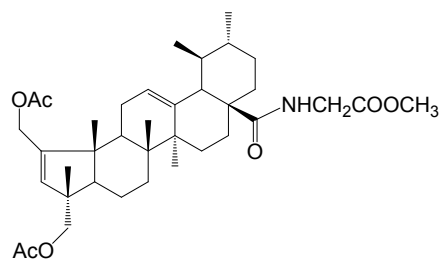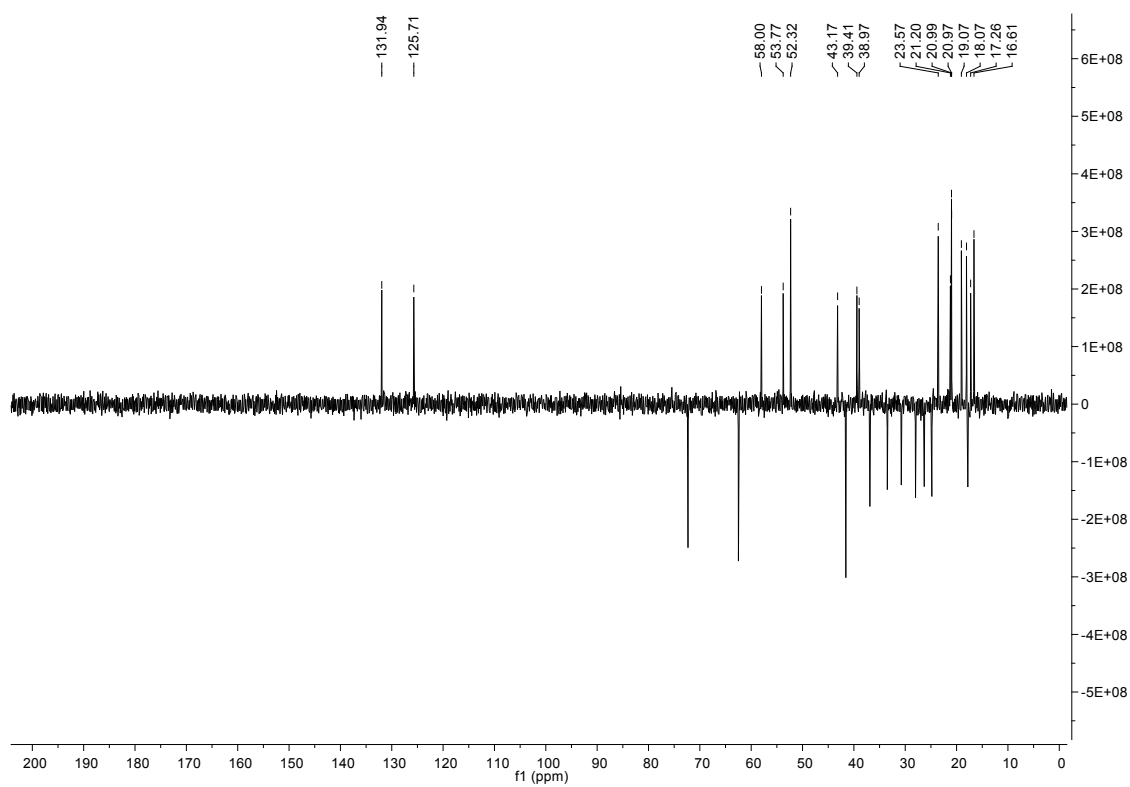

## 11. NMR data for compound 17

### 11.1 <sup>1</sup>H-NMR spectrum for compound 17 recorded in CDCl<sub>3</sub>

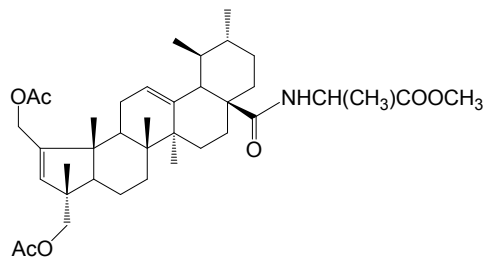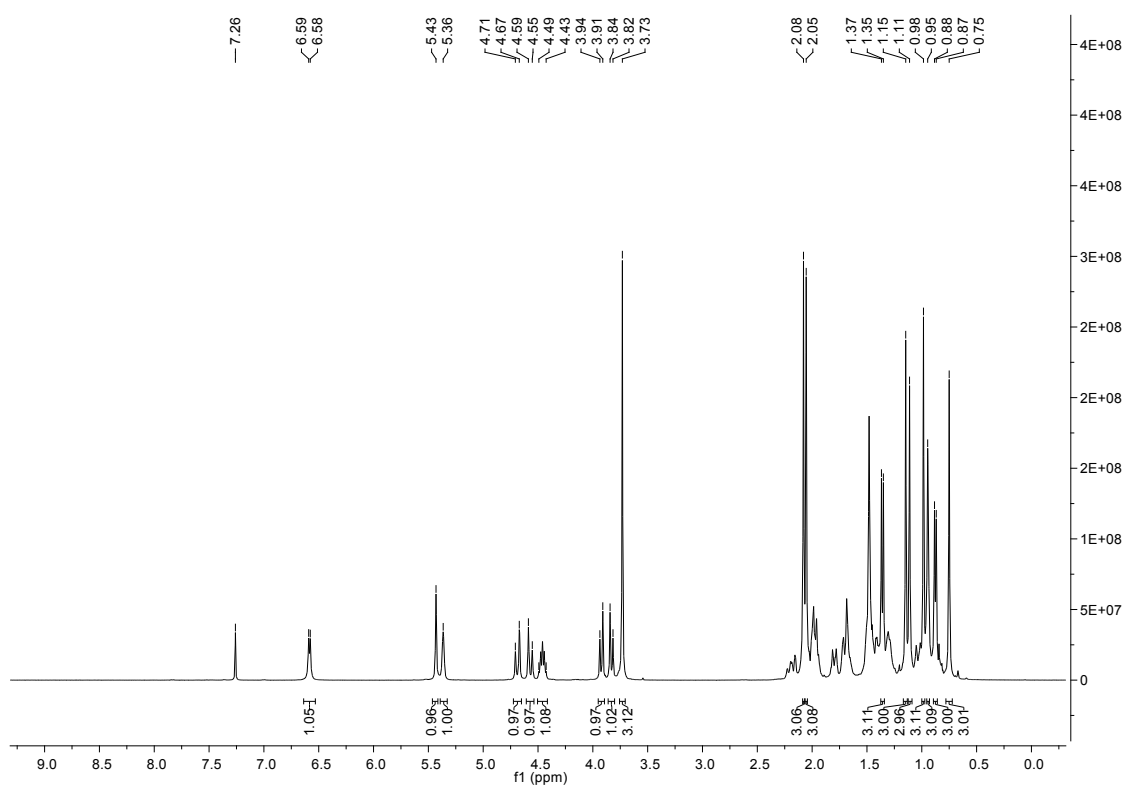

11.2  $^{13}\text{C}$ -NMR spectrum for compound 17 recorded in  $\text{CDCl}_3$

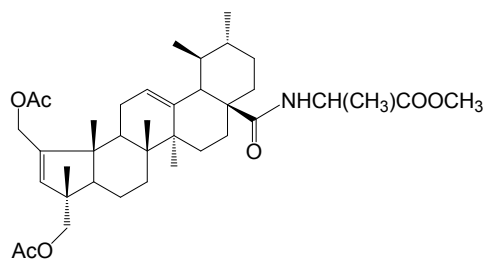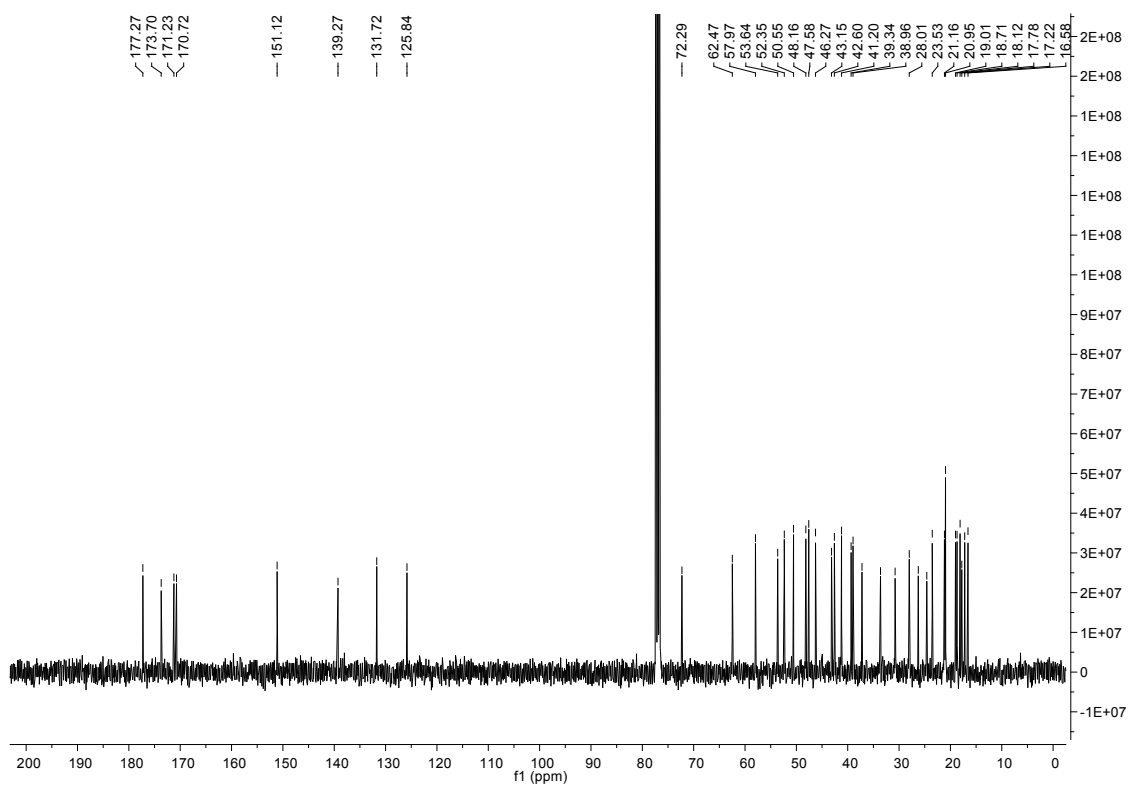

11.3 DEPT135 spectrum for compound 17 recorded in CDCl<sub>3</sub>

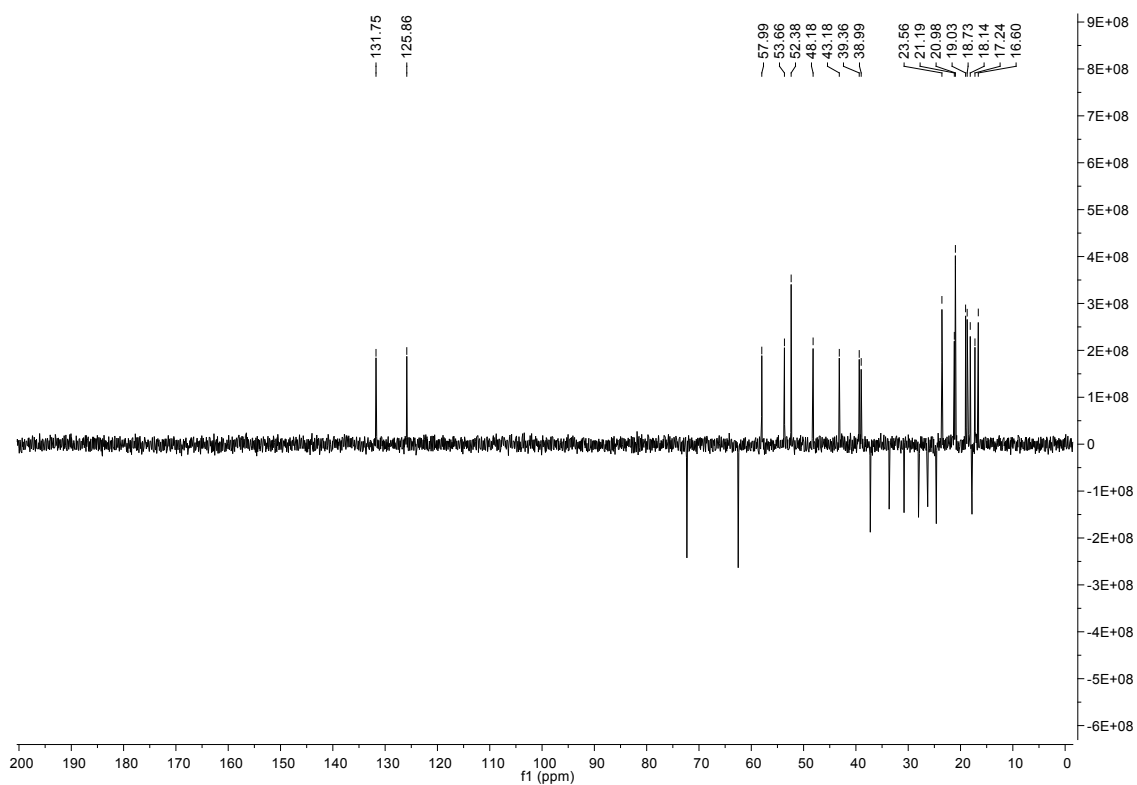

Supplement: c6ra04597a1.pdf [file c6ra04597a1.pdf]
